1 **Lsm12 mediates Pol $\eta$  deubiquitination to help *Saccharomyces cerevisiae* resist oxidative**  
2 **stress**

3 Rui Yao<sup>a,b,c</sup>, Liuji Shi<sup>a</sup>, Chengjin Wu<sup>b,c</sup>, Weihua Qiao<sup>b,c</sup>, Liming Liu<sup>b,c</sup> and Jing Wu<sup>a,#</sup>

4 **Running title:** Lsm12 mediates Pol $\eta$  deubiquitination

5 <sup>a</sup> School of Pharmaceutical Science, Jiangnan University, 1800 Lihu Road, Wuxi, Jiangsu  
6 214122, China

7 <sup>b</sup> The Key Laboratory of Industrial Biotechnology, Ministry of Education, Jiangnan University,  
8 1800 Lihu Road, Wuxi, Jiangsu 214122, China

9 <sup>c</sup> Laboratory of Food Microbial-Manufacturing Engineering, Jiangnan University, 1800 Lihu  
10 Road, Wuxi, Jiangsu 214122, China

11 <sup>#</sup> Address correspondence to Jing Wu: The School of Pharmaceutical Science, Jiangnan  
12 University, 1800 Lihu Road, Wuxi, Jiangsu 214122, China;

13 E-mail address: [wujing@jiangnan.edu.cn](mailto:wujing@jiangnan.edu.cn); Tel: +86-510-85197873; Fax: +86-510-85197873

14

15 **ABSTRACT**

16 In *Saccharomyces cerevisiae*, the Y-family DNA polymerase  $\eta$  (Pol $\eta$ ) regulates genome stability  
17 in response to different forms of environmental stress by translesion DNA synthesis. To elucidate  
18 the role of Pol $\eta$  in oxidative stress-induced DNA damage, we deleted or overexpressed the  
19 corresponding gene *RAD30*, and used transcriptome analysis to screen the potential genes  
20 associated with *RAD30* to respond to DNA damage. Under 2 mM H<sub>2</sub>O<sub>2</sub>, deletion of *RAD30*  
21 resulted in a 2.2-fold decrease in survival and a 2.8-fold increase in DNA damage, whereas  
22 overexpression of *RAD30* increased survival and decreased DNA damage by 1.2- and 1.4-fold,  
23 respectively, compared with that of the wild-type strain. Transcriptome and phenotypic analysis  
24 identified Lsm12 as a main factor involved in oxidative stress-induced DNA damage. Deleting  
25 *LSM12* caused growth defects while its overexpression enhanced cell growth under 2 mM H<sub>2</sub>O<sub>2</sub>.  
26 This effect was due to the physical interaction of Lsm12 with the UBZ domain of Pol $\eta$  to  
27 enhance Pol $\eta$  deubiquitination through Ubp3, and consequently promote Pol $\eta$  recruitment.  
28 Overall, these findings demonstrate that Lsm12 is a novel regulator mediating Pol $\eta$   
29 deubiquitination to promote its recruitment under oxidative stress. Furthermore, this study  
30 provides a potential strategy to maintain the genome stability of industrial strains during  
31 fermentation.

32

33

## 34 **IMPORTANCE**

35 Pol $\eta$  was shown to be critical for cell growth in the yeast *Saccharomyces cerevisiae*, and deletion  
36 of its corresponding gene *RAD30* caused a severe growth defect under exposure to oxidative  
37 stress with 2 mM H<sub>2</sub>O<sub>2</sub>. Furthermore, we found that Lsm12 physically interacts with Pol $\eta$  and  
38 promotes Pol $\eta$  deubiquitination and recruitment. Overall, these findings indicate Lsm12 as a  
39 novel regulator mediating Pol $\eta$  deubiquitination that regulates its recruitment in response to  
40 DNA damage induced by oxidative stress.

41 **KEY WORDS:** Pol $\eta$ , DNA damage, Oxidative stress, Deubiquitination, Recruitment

## 42 **INTRODUCTION**

43 Industrial microbial fermentation has been widely used in the production of chemicals. However,  
44 fermentation imposes a number of stresses on microorganisms, including oxidative stress, heat  
45 shock, osmotic stress, and exposure to toxic molecules and byproducts (1–3). Most of these  
46 factors form reactive oxygen species (ROS) that can cause DNA damage and genome instability,  
47 resulting in cell cycle arrest and cell death, thereby decreasing synthesis of the target compound  
48 (4,5). To solve this problem, cells have evolved a series of mechanisms for DNA damage  
49 tolerance.

50 In *Escherichia coli*, besides DNA repair mechanisms such as base excision repair and  
51 mismatch repair, there are two major pathways to deal with DNA damage: homology directed

52 gap repair and translesion synthesis (TLS) (6). In the budding yeast *Saccharomyces cerevisiae*,  
53 there are three major strategies to maintain genome stability: template switch (TS) (7),  
54 homologous recombination (HR) (8), and TLS (9). TS is an error-free damage branch of the  
55 DNA damage tolerance mechanism, which is regulated by the polyubiquitination of proliferating  
56 cell nuclear antigen (PCNA) catalyzed by the Ubc13 and Mms2 enzymes (7,10,11). HR mainly  
57 repairs DNA double-strand breaks and is regulated by Srs2 and Rad51 (11). Srs2 is a DNA  
58 helicase that can bind with *SIZ1*-mediated sumoylated PCNA to prevent HR, and Rad51 is a  
59 recombinase that promotes HR (12). Similar to TS, HR also belongs to the error-free branch of  
60 the DNA damage tolerance pathway (13). In contrast, TLS is referred to as the error-prone  
61 branch of DNA damage tolerance (14), and is a conserved mechanism from bacteria to mammals  
62 that recruits various specialized DNA polymerases to the stalled replication forks (15-17). These  
63 specialized polymerases mostly belong to the Y family, consisting of Pol $\eta$  and Rev1 in yeasts,  
64 encoded by *RAD30* and *REVI*, respectively (18). The B family polymerase  $\xi$  (Pol $\xi$ ) is also  
65 involved in TLS (19).

66 Pol $\eta$  was first identified in yeast and has been shown to play a dominant role in DNA  
67 damage tolerance. Previous studies also demonstrated that Pol $\eta$  was particularly efficient at  
68 bypassing ultraviolet (UV) radiation-induced cyclobutane pyrimidine dimers, and could  
69 accurately insert an A opposite to the T of the dimer (20). Humans that lack Pol $\eta$  suffer from  
70 xeroderma pigmentosum variant, resulting in an extreme sensitivity to UV radiation (21). Pol $\eta$   
71 can replicate 8-oxoguanine lesions efficiently and accurately by inserting a C opposite to the

72 damage site (22). Pol $\eta$  can also bypass other lesions such as (6-4) TT photoproducts (23),  
73 O-6-methylguanine (24), abasic sites (25), and DNA double-strand breaks (26). In *S. cerevisiae*,  
74 Pol $\eta$  is recruited to stalled replication forks by its physical interaction with monoubiquitinated  
75 PCNA (27). However, the precise mechanism by which Pol $\eta$  is recruited to PCNA and its  
76 specific role in the response to oxidative stress-induced DNA damage is unclear. Therefore, in  
77 this study, we evaluated the role of Pol $\eta$  in H<sub>2</sub>O<sub>2</sub>-induced oxidative stress and analyzed the  
78 underlying mechanism.

## 79 RESULTS

### 80 ***RAD30* is required for *S. cerevisiae* growth in the presence of H<sub>2</sub>O<sub>2</sub>**

81 First, we checked whether *RAD30* is required for the growth of *S. cerevisiae* in the presence of  
82 H<sub>2</sub>O<sub>2</sub>. Toward this end, the wild-type, and *rad30Δ* and *rad30Δ/RAD30* mutant strains were  
83 spotted and grown on yeast nitrogen base medium with and without 2 mM H<sub>2</sub>O<sub>2</sub> as a model of  
84 oxidative stress. Deletion of *RAD30* caused a significant growth defect in the presence of 2 mM  
85 H<sub>2</sub>O<sub>2</sub>, whereas overexpression of *RAD30* enhanced growth compared to that of the wild-type  
86 strain (Fig. 1A). Survival curves for all three strains were determined over a broad concentration  
87 range of H<sub>2</sub>O<sub>2</sub> (Fig. 1B). At 2 mM H<sub>2</sub>O<sub>2</sub>, 70.4% of the wild-type strain survived, while the  
88 *rad30Δ* and *rad30Δ/RAD30* strains exhibited reduced (31.7%) and increased (84.5%) survival,  
89 representing a 2.2-fold decreased and 1.2-fold increase, respectively. These results suggest that

90 *RAD30* contributes to cell growth in the presence of H<sub>2</sub>O<sub>2</sub>.

91 To investigate the underlying mechanism, single-cell gel electrophoresis of the wild-type,  
92 *rad30Δ*, and *rad30Δ/RAD30* strains was performed. Without H<sub>2</sub>O<sub>2</sub> treatment, both the *rad30Δ*  
93 and *rad30Δ/RAD30* strains displayed similar tail lengths relative to the wild-type strain. However,  
94 when treated with 2 mM H<sub>2</sub>O<sub>2</sub>, the *rad30Δ* and *rad30Δ/RAD30* strains showed a 2.8-fold  
95 increase and 1.4-fold decrease in tail length, respectively, when compared to that of the wild-type  
96 strain (Fig. 1C). This suggests that *RAD30* may play an important role in the response of *S.*  
97 *cerevisiae* to H<sub>2</sub>O<sub>2</sub>-induced DNA damage.

## 98 **Global transcriptome analysis of the *rad30Δ* and wild-type strains after treatment with** 99 **H<sub>2</sub>O<sub>2</sub>**

100 To further explain the weaker growth of the *rad30Δ* strain in the presence of H<sub>2</sub>O<sub>2</sub>, transcriptome  
101 sequencing was conducted to compare gene expression profiles in the *rad30Δ* and wild-type  
102 strains. We first compared the gene expression levels of wild-type cells at the log-phase of  
103 growth with and without H<sub>2</sub>O<sub>2</sub> treatment. Transcriptional profiling analysis revealed 121 genes  
104 whose expression was significantly modified ( $|\log_2(\text{fold change})| \geq 1$ , FDR < 0.05), including  
105 89 genes with up-regulated expression and 32 genes with down-regulated expression. In the  
106 *rad30Δ* strain, 804 genes displayed significantly differential expression, in which 424 were  
107 up-regulated and 380 were down-regulated (Fig. 2A). Specifically, there was a subset of 49  
108 up-regulated and 15 down-regulated genes that were common to both the wild-type and *rad30Δ*

---

109 strains (Table S1), indicating significant overlap. Gene Ontology (GO) analysis demonstrated  
110 that the commonly up-regulated genes were involved in DNA recombination process  
111 (GO:0006310), DNA damage response (GO:0006974), zinc ion homeostasis (GO:0006882), and  
112 oxidative stress response (GO:0006979), whereas the commonly down-regulated genes were  
113 enriched in GO processes such as cell wall chitin metabolism (GO:0006037), mitotic cell cycle  
114 (GO:0000278), and transport (GO: 0006810).

115 Transcription profiling also revealed 183 and 277 genes with up-regulated and  
116 down-regulated expression, respectively, in the *rad30Δ* strain when compared to the wild-type  
117 strain without H<sub>2</sub>O<sub>2</sub> treatment (Fig. 2B). However, when the cells were treated with 2 mM H<sub>2</sub>O<sub>2</sub>,  
118 167 genes were up-regulated and 184 were down-regulated. There were subsets of 27  
119 upregulated and 41 down-regulated genes that were common to both the normal and H<sub>2</sub>O<sub>2</sub>  
120 conditions (Table S2), indicating significant overlap. GO analysis showed that the commonly  
121 up-regulated genes were involved in amino acid metabolism (GO:0006520), protein folding  
122 (GO:0006457), and DNA binding (GO:0003677) whereas the commonly down-regulated genes  
123 were enriched in processes such as meiosis I (GO:0007127), adenine metabolism (GO:0046083),  
124 DNA damage response (GO:0006974), and RNA metabolism (GO:0016070).

125 Among the genes commonly down-regulated in the *rad30Δ* strain, *VHR2*, *BAP3*, *PHO3*,  
126 *LSM12*, *YHB1*, *PTR2*, *CAR1*, and *NDE1* were the most significantly altered between the strains,  
127 with 3.36-, 3.42-, 2.84-, 2.56-, 2.22-, 2.49-, 2.77-, and 3.05-fold differences, respectively, under  
128 the normal condition, and with 2.2-, 2.63-, 2.79-, 2.41-, 1.85-, 2.55-, 2.09-, and 1.55-fold

129 differences, respectively, under 2 mM H<sub>2</sub>O<sub>2</sub>. These results were further verified by reverse  
130 transcription-polymerase chain reaction (RT-PCR) analysis (Fig. 2C, D). To test whether these  
131 proteins interact with Polη or act in the same pathway, these genes were deleted or overexpressed  
132 in each strain, and the consequence on resistance to H<sub>2</sub>O<sub>2</sub> stress was evaluated. Interestingly,  
133 deletion of *VHR2*, *LSM12*, or *YHB1* caused growth defects under the 2 mM H<sub>2</sub>O<sub>2</sub> condition (Fig.  
134 2E); however, only overexpression of *LSM12* conferred resistance to H<sub>2</sub>O<sub>2</sub> (Fig. 2F). Based on  
135 these results, we hypothesized that *LSM12* may coordinate with *RAD30* to play an important role  
136 in DNA damage tolerance.

### 137 **Polη interacts with Lsm12 through the UBZ domain**

138 On the basis of the above results, the subcellular localization of Polη and Lsm12 was determined.  
139 Under the normal condition, Lsm12 localized both in the nucleus and cytoplasm; however,  
140 following treatment with 2 mM H<sub>2</sub>O<sub>2</sub>, Lsm12 was mostly detected in the nucleus (Fig. 3A). In  
141 contrast, Polη was located in the nucleus both with and without H<sub>2</sub>O<sub>2</sub> treatment. These results  
142 indicated that the relative distribution of Lsm12 in the nucleus increased with H<sub>2</sub>O<sub>2</sub> treatment,  
143 supporting the hypothesis that Polη and Lsm12 may function together in the response to H<sub>2</sub>O<sub>2</sub>  
144 treatment in the nucleus.

145 To further confirm this mechanism, we next examined the direct relationship between  
146 Lsm12 and Polη. First, the genetic interaction between Lsm12 and Polη was evaluated using spot  
147 assays, which revealed that the phenotype of the *rad30Δlsm12Δ* double mutant was similar to



---

148 that of the *rad30Δ* and *lsm12Δ* single mutants (Fig. 3B). Moreover, the *rad30Δlsm12Δ* double  
149 mutant showed 33.6% survival, whereas the *rad30Δ* and *lsm12Δ* single mutants exhibited 31.7%  
150 and 36.5% survival, respectively (Table 1). These results demonstrated that the two genes have  
151 epistatic interactions.

152 Next, the physical interaction between Lsm12 and Polη was determined. As shown in Fig.  
153 3C, the yeast two-hybrid (Y2H) analysis revealed a gene-specific interaction between the  
154 full-length of Lsm12 and Polη. However, the D570A mutant, with an inactive UBZ domain of  
155 Polη, failed to interact with Lsm12. Furthermore, co-immunoprecipitation assays confirmed that  
156 Lsm12 and Polη physically interact *in vivo* (Fig. 3D), whereas this interaction did not occur with  
157 the D570A mutant, consistent with the Y2H results (data not shown). These observations suggest  
158 that Lsm12 physical interacts with Polη at the UBZ domain.

### 159 **Lsm12 promotes Polη recruitment in the presence of H<sub>2</sub>O<sub>2</sub>**

160 Given the genetic and physical interaction between Lsm12 and Polη, we supposed that Lsm12  
161 likely plays a role in DNA damage tolerance. Therefore, we next explored the mechanism by  
162 which Lsm12 repairs or facilitates tolerance to H<sub>2</sub>O<sub>2</sub>-induced DNA damage. Deletion of *LSM12*  
163 did not affect the mRNA or protein levels of Polη compared with those of the wild-type (data not  
164 shown). However, under H<sub>2</sub>O<sub>2</sub> treatment, deletion of *LSM12* led to a decrease in the number of  
165 Polη foci formed with only 37.2%, in contrast to the 69.5% foci detected in the wild-type strain  
166 (Fig.4A and 4B). To further examine this result, the number of foci in the two strains after

167 treatment with methyl methane sulfonate(MMS) were measured. Similarly, there were 76.2%  
168 and 43.3% Pol $\eta$  foci in the wild-type and *lsm12 $\Delta$*  strain, respectively. These results suggest that  
169 Lsm12 promotes Pol $\eta$  recruitment to facilitate tolerance of DNA damage.

### 170 **Lsm12 deubiquitinates Pol $\eta$ through Ubp3**

171 To elucidate the mechanism underlying the effect of Lsm12 in enhancing the formation of  
172 Pol $\eta$  foci in *S. cerevisiae*, the levels of PCNA and Pol $\eta$  monoubiquitination were compared in  
173 the wild-type and *lsm12 $\Delta$*  strains without and with H<sub>2</sub>O<sub>2</sub> treatment. As shown in Fig. 5A and 5B,  
174 the level of PCNA monoubiquitination significantly increased in both the wild-type (120%) and  
175 *lsm12 $\Delta$*  (94%) strains after 2 mM H<sub>2</sub>O<sub>2</sub> treatment, and there was no difference between the  
176 strains under either condition. By contrast, the level of Pol $\eta$  monoubiquitination significantly  
177 decreased in the wild-type (42%) after 2 mM H<sub>2</sub>O<sub>2</sub> treatment, and was 102% higher in the  
178 *lsm12 $\Delta$*  strain. This difference in the effects on PCNA and Pol $\eta$  monoubiquitination  
179 demonstrated that Lsm12 enhances Pol $\eta$  deubiquitination to promote Pol $\eta$  recruitment.

180 Given the lack of evidence that Lsm12 has its own deubiquitination activity, we  
181 hypothesized that Lsm12 binds with some deubiquitinase to catalyze the deubiquitination of Pol $\eta$ .  
182 To identify the specific deubiquitinase, we focused on the *UBP2*, *UBP3*, and *UBP15* genes,  
183 which are known to be associated with DNA damage tolerance. Under H<sub>2</sub>O<sub>2</sub> treatment, deletion  
184 of *UBP2* and *UBP15* did not affect the level of Pol $\eta$  monoubiquitination compared with that of  
185 the wild-type, whereas deletion of *UBP3* increased Pol $\eta$  monoubiquitination (75%) (Fig. 5C).

186 Moreover, the level of Pol $\eta$  monoubiquitination in the *lsm12 $\Delta$ ubp3 $\Delta$*  double-mutant was similar  
187 to that of the *lsm12 $\Delta$*  and *ubp3 $\Delta$*  single-mutants under the H<sub>2</sub>O<sub>2</sub> condition (Fig. 5D). Spot and  
188 survival assays also showed that the phenotype of the *lsm12 $\Delta$ ubp3 $\Delta$*  double-mutant was similar  
189 to that of the two single-mutants (Fig. 5E and Table 1). Further, both Y2H and  
190 co-immunoprecipitation experiments verified the physical interaction of Ubp3 with Lsm12 (Fig.  
191 5F and 5G). These results suggest that Lsm12 promotes the deubiquitination of Pol $\eta$ , likely by  
192 binding with Ubp3.

## 193 DISCUSSION

194 Translesion synthesis is a key pathway to maintain genome stability; however, the precise  
195 molecular mechanisms have not yet been clarified in detail. In this study, we demonstrated that  
196 deletion of *RAD30* caused a severe growth defect in the yeast *S. cerevisiae*, while its  
197 overexpression enhanced growth under oxidative stress due to exposure 2 mM H<sub>2</sub>O<sub>2</sub>. The stress  
198 response involves physical interaction between Lsm12 and Pol $\eta$  to tolerate or repair the  
199 consequent DNA damage. As a result, Lsm12 promoted Pol $\eta$  deubiquitination and facilitated  
200 Pol $\eta$  focus formation. These results demonstrate that Lsm12 mediates Pol $\eta$  deubiquitination and  
201 regulates its recruitment to help cells resist oxidative stress.

202 Previous studies have also indicated that *RAD30* appears to regulate cell growth under  
203 H<sub>2</sub>O<sub>2</sub>-induced DNA damage. In *S. cerevisiae*, cells lacking this gene are sensitive to UV  
204 radiation (28), MMS (29), and hydroxyurea (30). Yeast overexpressing Pol $\eta$  from *Trypanosoma*

205 *cruzi* were reported to be more resistant to H<sub>2</sub>O<sub>2</sub> exposure than the wild type (31). In human cells,  
206 loss of *POLH*, the orthologous gene to *RAD30* in *S. cerevisiae*, resulted in increased sensitivity  
207 to oxidative stress (32). Furthermore, knockdown of Polη in human cells decreased cell survival,  
208 and accelerated DNA damage and apoptosis (33). In our study, deletion of *RAD30* exhibited a  
209 severe growth defect, whereas overexpression of *RAD30* enhanced cell growth compared to that  
210 of the wild-type strain under 2 mM H<sub>2</sub>O<sub>2</sub>. This phenomenon was consistent with the previous  
211 findings in human cells, suggesting that Polη is a highly conserved protein from yeast to humans.

212 Lsm12 seems to be a multifunctional protein. Indeed, a previous study demonstrated that  
213 Lsm12 was involved in many aspects of RNA processing such as mRNA degradation, tRNA  
214 splicing, pre-mRNA splicing and degradation, and rRNA processing (34). In addition, Kim et al.  
215 (35) demonstrated that Lsm12 is involved in DNA replication stress. The present study provides  
216 new insight into this mechanism, showing that Lsm12 interacted with Polη to respond to the  
217 DNA damage induced by oxidative stress, and that this interaction occurs on the UBZ domain of  
218 Polη. In *S. cerevisiae*, Polη has two conserved domains, PIP and UBZ, encoded by the FF627,  
219 628 and D570 residues, respectively (18). The PIP domain mainly interacts with  
220 monoubiquitinated PCNA when DNA is damaged (33). However, the function of the UBZ  
221 domain is not fully understood. A recent study showed that an inactive UBZ domain  
222 (*RAD30-D570A* mutant) failed to complement the phenotype of the *rad30Δ* mutant (36).  
223 Moreover, the UBZ domain of Polη was shown to be essential for 8-oxoguanine-induced  
224 mutagenesis (37).

225 Here, we demonstrated that Lsm12 promoted Pol $\eta$  deubiquitination and recruitment. When cells  
226 are under DNA replication stress, the Y family of DNA polymerases is recruited to the stalled  
227 replication forks (38). In this study, deletion of *LSM12* decreased the rate of Pol $\eta$  focus  
228 formation under the H<sub>2</sub>O<sub>2</sub> condition, indicating that the absence of Lsm12 decreased Pol $\eta$   
229 recruitment. This is likely due to two mechanisms: (i) increasing PCNA monoubiquitination could  
230 promote Pol $\eta$  recruitment, because PCNA monoubiquitination can enhance affinity with Y  
231 family DNA polymerases (39), and Rad6/Rad18 induced PCNA monoubiquitination is essential  
232 for Pol $\eta$  recruitment (40); and (ii) decreasing Pol $\eta$  monoubiquitination could promote Pol $\eta$   
233 recruitment. Previous studies indicated that when cells were exposed to UV radiation, the level  
234 of Pol $\eta$  monoubiquitination was down-regulated in the S-phase as a response to DNA damage  
235 (41). Similar results have also been detected in human cells (42). In this study, Lsm12 enhanced  
236 Pol $\eta$  recruitment through another mechanism given the observed decrease in the level of Pol $\eta$   
237 monoubiquitination. However, this raises the question as to how Lsm12 deubiquitinates Pol $\eta$ . In  
238 *S. cerevisiae*, three deubiquitinases may be responsible for Pol $\eta$  deubiquitination: Ubp15, Ubp2,  
239 and Ubp3. Ubp15 leads to the accumulation of the mono-, di-, and poly-ubiquitination forms of  
240 PCNA (43). Ubp2 has been associated with oxidative stress, and the homologous gene in humans  
241 was shown to play a role in DNA damage tolerance (43). Ubp3 also appears to be involved in  
242 DNA replication stress given that a global protein abundance analysis revealed that the level of  
243 Ubp3 increased in response to exposure to DNA damage agents (44). Moreover, Ubp3 can  
244 stabilize Rad4 to enhance UV resistance, and promote the repair of UV-induced DNA damage

245 (45). In this study, only the *ubp3Δ* mutant was found to increase the Polη monoubiquitination  
246 level, and genetic analyses further showed that *UBP3* and *LSM12* were epistatic. Accordingly,  
247 these two genes may function together in the deubiquitination of Polη. Both the Y2H and  
248 co-immunoprecipitation experiments confirmed a physical interaction between Lsm12 and Ubp3,  
249 which further validated our hypothesis.

250 In summary, we have identified a function of Lsm12 in the response to oxidative  
251 stress-induced DNA damage through interaction with Polη to promote Polη deubiquitination and  
252 recruitment. When cells were subjected to oxidative DNA replication stress, the amount of  
253 Lsm12 in the nucleus was increased, thereby promoting Polη deubiquitination and recruitment,  
254 to ultimately activate the TLS pathway and bypass DNA lesions. Cells with *LSM12* deleted failed  
255 to deubiquitinate Polη, leading to a defective TLS pathway (Fig. 6). These findings provide new  
256 insights into the molecular mechanisms of oxidative stress-induced DNA damage and suggest  
257 potential strategies to maintain the genomic stability of industrial strains.

## 258 **MATERIALS and METHODS**

259 Yeast strains, media and culture conditions

260 The *Saccharomyces cerevisiae* strains and plasmids used in this study are listed in Table S3. Null  
261 mutations were constructed by homologous recombination (46), and the overexpression  
262 constructs were made by either available restriction sites of predetermined fragments flanked by

263 restriction sites in the primers. Site-specific mutations were made by the PCR-based method  
264 using the mutagenic primers. All primers used in this study are listed in Table S4 and S5.

265 Yeast cells were cultivated in Yeast extract peptone dextrose (YPD) medium (1% yeast  
266 extract, 2% Tryptone, 2% glucose, pH 6.5) and Yeast nitrogen base (YNB) medium (0.67% yeast  
267 nitrogen base without amino acid, 2% glucose, and supplemented with adenine (20.25 mg/liter),  
268 arginine (20 mg/liter), histidine (20 mg/liter), leucine (60 mg/liter), lysine (200 mg/liter),  
269 methionine (20 mg/liter), threonine (300 mg/liter), tryptophan (20 mg/liter), and uracil (20  
270 mg/liter) pH 6.5). Yeast cells were grown at 30 °C with constant shaking at 200 rpm in a  
271 shaker-incubator chamber.

272

273 **Table S3.** Strains and Plasmids used in this study.

| Strain                           | Relevant characteristic                                                                                                                                                                                    | Ref        |
|----------------------------------|------------------------------------------------------------------------------------------------------------------------------------------------------------------------------------------------------------|------------|
| <b>Strains</b>                   |                                                                                                                                                                                                            |            |
| <i>BY4741</i>                    | <i>Mat α; his3Δ 1; leu2Δ 0; met15Δ 0; ura3Δ 0;</i>                                                                                                                                                         | This study |
| <i>rad30Δ</i>                    | <i>Mat α; his3Δ 1; leu2Δ 0; met15Δ 0; ura3Δ 0; RAD30::LEU2</i>                                                                                                                                             | This study |
| <i>vh2Δ</i>                      | <i>Mat α; his3Δ 1; leu2Δ 0; met15Δ 0; ura3Δ 0; VHR2:: HIS3</i>                                                                                                                                             | This study |
| <i>bap3Δ</i>                     | <i>Mat α; his3Δ 1; leu2Δ 0; met15Δ 0; ura3Δ 0; BAP3:: HIS3</i>                                                                                                                                             | This study |
| <i>pho3Δ</i>                     | <i>Mat α; his3Δ 1; leu2Δ 0; met15Δ 0; ura3Δ 0; PHO3:: HIS3</i>                                                                                                                                             | This study |
| <i>lsm12Δ</i>                    | <i>Mat α; his3Δ 1; leu2Δ 0; met15Δ 0; ura3Δ 0; LSM12:: HIS3</i>                                                                                                                                            | This study |
| <i>yhb1Δ</i>                     | <i>Mat α; his3Δ 1; leu2Δ 0; met15Δ 0; ura3Δ 0; YHB1:: HIS3</i>                                                                                                                                             | This study |
| <i>ptr2Δ</i>                     | <i>Mat α; his3Δ 1; leu2Δ 0; met15Δ 0; ura3Δ 0; PTR2:: HIS3</i>                                                                                                                                             | This study |
| <i>car1Δ</i>                     | <i>Mat α; his3Δ 1; leu2Δ 0; met15Δ 0; ura3Δ 0; CAR1:: HIS3</i>                                                                                                                                             | This study |
| <i>nde1Δ</i>                     | <i>Mat α; his3Δ 1; leu2Δ 0; met15Δ 0; ura3Δ 0; NDE1:: HIS3</i>                                                                                                                                             | This study |
| <i>ubp2Δ</i>                     | <i>Mat α; his3Δ 1; leu2Δ 0; met15Δ 0; ura3Δ 0; UBP2:: HIS3</i>                                                                                                                                             | This study |
| <i>ubp3Δ</i>                     | <i>Mat α; his3Δ 1; leu2Δ 0; met15Δ 0; ura3Δ 0; UBP3:: HIS3</i>                                                                                                                                             | This study |
| <i>ubp15Δ</i>                    | <i>Mat α; his3Δ 1; leu2Δ 0; met15Δ 0; ura3Δ 0; UBP15:: HIS3</i>                                                                                                                                            | This study |
| <i>rad30Δ lsm12Δ</i>             | <i>Mat α; his3Δ 1; leu2Δ 0; met15Δ 0; ura3Δ 0; RAD30::LEU2; LSM12:: HIS3</i>                                                                                                                               | This study |
| <i>rad30Δ ubp3Δ</i>              | <i>Mat α; his3Δ 1; leu2Δ 0; met15Δ 0; ura3Δ 0; RAD30::LEU2; UBP3:: HIS3</i>                                                                                                                                | This study |
| <i>rad30Δ/RAD30</i>              | <i>Mat α; his3Δ 1; leu2Δ 0; met15Δ 0; ura3Δ 0; RAD30::LEU2;</i><br><i>pY26- P<sub>GPD</sub>/RAD30</i>                                                                                                      | This study |
| <i>vh2Δ/VHR2</i>                 | <i>Mat α; his3Δ 1; leu2Δ 0; met15Δ 0; ura3Δ 0; VHR2:: HIS3;</i><br><i>pY26- P<sub>GPD</sub>/VHR2</i>                                                                                                       | This study |
| <i>bap3Δ/BAP3</i>                | <i>Mat α; his3Δ 1; leu2Δ 0; met15Δ 0; ura3Δ 0; BAP3:: HIS3;</i><br><i>pY26- P<sub>GPD</sub>/BAP3</i>                                                                                                       | This study |
| <i>pho3Δ/PHO3</i>                | <i>Mat α; his3Δ 1; leu2Δ 0; met15Δ 0; ura3Δ 0; PHO3:: HIS3;</i><br><i>pY26- P<sub>GPD</sub>/PHO3</i>                                                                                                       | This study |
| <i>lsm12Δ/LSM12</i>              | <i>Mat α; his3Δ 1; leu2Δ 0; met15Δ 0; ura3Δ 0; LSM12:: HIS3;</i><br><i>pY26- P<sub>GPD</sub>/RAD30</i>                                                                                                     | This study |
| <i>yhb1Δ/YHB1</i>                | <i>Mat α; his3Δ 1; leu2Δ 0; met15Δ 0; ura3Δ 0; YHB1:: HIS3;</i><br><i>pY26- P<sub>GPD</sub>/Lsm12</i>                                                                                                      | This study |
| <i>ptr2Δ/PTR2</i>                | <i>Mat α; his3Δ 1; leu2Δ 0; met15Δ 0; ura3Δ 0; PTR2:: HIS3;</i><br><i>pY26- P<sub>GPD</sub>/PTR2</i>                                                                                                       | This study |
| <i>car1Δ/CAR1</i>                | <i>Mat α; his3Δ 1; leu2Δ 0; met15Δ 0; ura3Δ 0; CAR1:: HIS3;</i><br><i>pY26- P<sub>GPD</sub>/CAR1</i>                                                                                                       | This study |
| <i>nde1Δ/NDE1</i>                | <i>Mat α; his3Δ 1; leu2Δ 0; met15Δ 0; ura3Δ 0; NDE1:: HIS3;</i><br><i>pY26- P<sub>GPD</sub>/NDE1</i>                                                                                                       | This study |
| <i>AH109</i>                     | <i>trp1Δ leu2 ura3Δ his3Δ gal4Δ gal80Δ LYS2::GAL1<sub>UAS</sub>-GAL1<sub>TATA</sub>-HIS3</i><br><i>GAL2<sub>UAS</sub>-GAL2<sub>TATA</sub>-ADE2 URA3:: MEL1<sub>UAS</sub>-MEL1<sub>TATA</sub>-LacZ MEL1</i> | Clontech   |
| <i>BY4741/RAD30-HA/LSM12-Myc</i> | <i>Mat α; his3Δ 1; leu2Δ 0; met15Δ 0; ura3Δ 0; RAD30::LEU2; LSM12:: HIS3</i>                                                                                                                               | This study |



|                                        |                                                                                             |            |
|----------------------------------------|---------------------------------------------------------------------------------------------|------------|
|                                        | <i>pY26- P<sub>GPD</sub>/RAD30-HA;P<sub>TEF</sub>/LSM12-Myc</i>                             |            |
| <i>BY4741/UBP3-HA/LSM12-Myc</i>        | <i>Mat α; his3Δ 1; leu2Δ 0; met15Δ 0; ura3Δ 0; UBP3::LEU2; LSM12:: HIS3</i>                 | This study |
|                                        | <i>pY26- P<sub>GPD</sub>/UBP3-HA;P<sub>TEF</sub>/LSM12-Myc</i>                              |            |
| <i>BY4741/RAD30-eGFP/LSM12-mCherry</i> | <i>Mat α; his3Δ 1; leu2Δ 0; met15Δ 0; ura3Δ 0; RAD30::RAD30-eGFP; LSM12:: LSM12-mCherry</i> | This study |
| <b>Plasmids</b>                        |                                                                                             |            |
| <i>PY26</i>                            | 2 μm, Amp, <i>URA3, P<sub>GPD</sub>, P<sub>TEF</sub></i>                                    | Turbo      |
| <i>pGBKT7</i>                          | Kan, <i>TRP1, GAL4 DNA-BD fusion</i>                                                        | Clontech   |
| <i>pGADT7</i>                          | Amp, <i>LEU2, GAL4 DNA-BD fusion</i>                                                        | Clontech   |

274

275 **Table S4.** Primers used for plasmid construction in this study.

276

| Primer          | Sequence (5'-3')                                           |
|-----------------|------------------------------------------------------------|
| <b>Deletion</b> |                                                            |
| L-RAD30-F1      | GTTCAGGCTCTGCAACTGG                                        |
| L-RAD30-F2      | <u>GATCTTCTTAGGGGCAGACAT</u> GCTTTGTCTTGTTTTATCAAAGC       |
| LEU2(RAD30)-F1  | <u>GCTTTGATAAAACAAGACAAAGCAT</u> GTCTGCCCTAAGAAGATC        |
| LEU2(RAD30)-F2  | <u>CCATATAATTGTCTATTTGGAATAGG</u> TAAAGCAAGGATTTTCTTAACTTC |
| R-RAD30-F1      | <u>GAAGTTAAGAAAATCCTTGCTTA</u> ACCTATTCCAAATAGACAATTATATGG |
| R-RAD30-F2      | GGTCTTCAGAAGAGTAATGATAGTG                                  |
| L-VHR2-F1       | CCACCTGTTTCGGCAATTTTTG                                     |
| L-VHR2-F2       | <u>AGGGCTTTCTGCTCTGTCAT</u> CTTGCAATTTTTACTCTGAC           |
| HIS3(Vhr2)-F1   | <u>GTCAGAGTAAAAATTGCAAGAT</u> GACAGAGCAGAAAGCCCT           |
| HIS3(Vhr2)-F2   | <u>GGGGATGATGCAAGCGGGCCTAT</u> CTACATAAGAACACCTTTGG        |
| R-VHR2-F1       | <u>CCAAAGGTGTTCTTATGTAG</u> ATAGGCCCGCTTGCATCATCCCC        |
| R-VHR2-F2       | CTGAAGAACTGGGCCTTGTC                                       |
| L-BAP3-F1       | GGCACCTTCTTCGTTTCTTCATC                                    |
| L-BAP3-F2       | <u>GGGCTTTCTGCTCTGTCAT</u> TACCTTAGGGGAAAGAAAATATTA        |
| HIS3(BAP3)-F1   | <u>TAATATTTTCTTTCCCCTAAGG</u> TAATGACAGAGCAGAAAGCCC        |
| HIS3(BAP3)-F2   | <u>TAAAATGCTATTTATTATGCA</u> CTACATAAGAACACCTTTGGTG        |
| R-BAP3-F1       | <u>CCACCAAAGGTGTTCTTATGTAG</u> TGCATAATAAATAGCATTTT        |
| R-BAP3-F2       | GTATATACACCACTATCGCCAC                                     |
| L-PHO3-F1       | GCAGCGTCAGTAACTCTACTG                                      |
| L-PHO3-F2       | <u>CTAGGGCTTTCTGCTCTGTCAT</u> AGGTAATTTGGAATGGCCC          |
| HIS3(PHO3)-F1   | <u>GGGCCATTCCAAATTACCTAT</u> GACAGAGCAGAAAGCCCTAG          |
| HIS3(PHO3)-F2   | <u>AATATTATTTATTTATACAAT</u> CTACATAAGAACACCTTTGGTG        |
| R-PHO3-F1       | <u>CCACCAAAGGTGTTCTTATGTAG</u> ATTGTATAAATAAATAATATT       |
| R-PHO3-F2       | CATCAGCTATTTCTTTGGCCAC                                     |

---

|                |                                                     |
|----------------|-----------------------------------------------------|
| L-LSM12-F1     | <u>CCATAAGTTGAAGCCGGGCA</u>                         |
| L-LSM12-F2     | <u>CTAGGGCTTTCTGCTCTGTCATGGACGAAAGATGCAAATTG</u>    |
| HIS3(LSM12)-F1 | <u>CAATTTGCATCTTTCGTCCATGACAGAGCAGAAAGCCCTAG</u>    |
| HIS3(LSM12)-F2 | <u>ATCGTTTCCGTCATTAATTAATCTACATAAGAACACCTTTGG</u>   |
| R-LSM12-F1     | <u>ACCAAAGGTGTTCTTATGTAGATTAATTAATGACGGAAACGAT</u>  |
| R-LSM12-F2     | <u>CATCGGAAGTCAGTTCTGGTG</u>                        |
| L-YHB1-F1      | <u>GACGCGCTTATGCGTCTTC</u>                          |
| L-YHB1-F2      | <u>TAGGGCTTTCTGCTCTGTCATAATGAATAAAGTCTTTGTGT</u>    |
| HIS3(YHB1)-F1  | <u>ACACAAAGACTTTATTCATTATGACAGAGCAGAAAGCCCTA</u>    |
| HIS3(YHB1)-F2  | <u>GAAGTTTCCGAGGCTTAACGCCTACATAAGAACACCTTTGGT</u>   |
| R-YHB1-F1      | <u>CACCAAAGGTGTTCTTATGTAGGCGTTAAGCCTCGGAAACTTC</u>  |
| R-YHB1-F2      | <u>CATGCCATTATACTGGGGTC</u>                         |
| L-PTR2-F1      | <u>CCGCCCTACTGACATCCTG</u>                          |
| L-PTR2-F2      | <u>AGGGCTTTCTGCTCTGTCATTATAAGAGTTTATTAGTGAT</u>     |
| HIS3(PTR2)-F1  | <u>GATCACTAATAAACTCTTATAATGACAGAGCAGAAAGCCC</u>     |
| HIS3(PTR2)-F2  | <u>GACAGTAAGTTAATTAACGCACACTACATAAGAACACCTTTGGT</u> |
| R-PTR2-F1      | <u>ACCAAAGGTGTTCTTATGTAGTGCGTTAATTAACTTACTGTC</u>   |
| R-PTR2-F2      | <u>CACACCAACCAATTGCGTCC</u>                         |
| L-CAR1-F1      | <u>CACATCATACGGATGAACTACG</u>                       |
| L-CAR1-F2      | <u>CTAGGGCTTTCTGCTCTGTCATCTTGATAGTAGTTATTGTTAT</u>  |
| HIS3(CAR1)-F1  | <u>ATAACAATAACTACTATCAAGATGACAGAGCAGAAAGCCCTAG</u>  |
| HIS3(CAR1)-F2  | <u>GATAAAAGGGATGATGATATAAACTACATAAGAACACCTTTGG</u>  |
| R-CAR1-F1      | <u>ACCAAAGGTGTTCTTATGTAGTTTATATCATCATCCCTTTTATC</u> |
| R-CAR1-F2      | <u>AGGTGGAAGTGAACAGATGGC</u>                        |
| L-NDE1-F1      | <u>GATGCTCGAGATGCCCTG</u>                           |
| L-NDE1-F2      | <u>CTAGGGCTTTCTGCTCTGTCATTATTATTGGTTAATTTTTTAT</u>  |
| HIS3(NDE1)-F1  | <u>AATAAAAAATTAACCAATAATAATGACAGAGCAGAAAGCCCTAG</u> |
| HIS3(NDE1)-F2  | <u>TTATTCTCTTGATCTATTTCTACTACATAAGAACACCTTTGG</u>   |
| R-NDE1-F1      | <u>CCAAAGGTGTTCTTATGTAGTAGAAATAGATACAAGAGAATAA</u>  |
| R-NDE1-F2      | <u>GTCAATTCAGGATTCACATGGG</u>                       |
| L-UBP2-F1      | <u>CCGCTATCAAGCATGATTCGT</u>                        |
| L-UBP2-F2      | <u>CTAGGGCTTTCTGCTCTGTCATTTCCCTTATACCTTCTTAACC</u>  |
| HIS3(UBP2)-F1  | <u>GGTTAAGAAGGTATAAGGAAATGACAGAGCAGAAAGCCCTAG</u>   |
| HIS3(UBP2)-F2  | <u>ATAAACTCTTCATTGACTAAGACTACATAAGAACACCTTTGGT</u>  |
| R-UBP2-F1      | <u>ACCAAAGGTGTTCTTATGTAGTCTTAGTCAATGAAGAGTTTAT</u>  |
| R-UBP2-F2      | <u>TGATATTCTCTCCCTCGTCGTC</u>                       |
| L-UBP3-F1      | <u>GCGGCTATTTTACTTGGATCAC</u>                       |
| L-UBP3-F2      | <u>TAGGGCTTTCTGCTCTGTCATTTTTTTAATGATGATGGAA</u>     |
| HIS3(UBP3)-F1  | <u>TTCCATCATCATTAATAAAAAAATGACAGAGCAGAAAGCCCTA</u>  |

---

---

|                |                                                     |
|----------------|-----------------------------------------------------|
| HIS3(UBP3)-F2  | <u>GTCTATAATACCACCCCGTCCTACATAAGAACACCTTTGG</u>     |
| R-UBP3-F1      | <u>CCAAAGGTGTTCTTATGTAGGACGGGGGGTGGTATTATAGAC</u>   |
| R-UBP3-F2      | <u>GTGTTGGACTCATCGTCTGTG</u>                        |
| L-UBP15-F1     | <u>CGAGTGTGAAAAAAGTCGCTAC</u>                       |
| L-UBP15-F2     | <u>CTAGGGCTTTCTGCTCTGTCATTGTTTGTGTTGAAGAGACTAAT</u> |
| HIS3(UBP15)-F1 | <u>GATTAGTCTCTTCAAACAAACAATGACAGAGCAGAAAGCCCTA</u>  |
| HIS3(UBP15)-F2 | <u>CTAAACATAGTCGTAAGACGTA</u> CTACATAAGAACACCTTTGGT |
| R-UBP15-F1     | <u>ACCAAAGGTGTTCTTATGTAGT</u> ACGTCTTACGACTATGTTTAG |
| R-UBP15-F2     | <u>TAAAGCAAACCAAGAAGCCG</u>                         |

### Overexpression

|          |                                             |
|----------|---------------------------------------------|
| RAD30-F1 | <u>CCCAAGCTT</u> ATGTCAAATTTACTTGGAAGGAG    |
| RAD30-F2 | <u>CCGCTCGAGT</u> CATTTTTTTCTTGTA AAAAATGAT |
| VHR-F1   | <u>CCCAAGCTT</u> ATGAGCTCTGAAGACGAATTGG     |
| VHR-F2   | <u>CCGCTCGAGT</u> CAGTTTTTAATGATCATTGGTC    |
| BAP3-F1  | <u>CCCAAGCTT</u> ATGTCAGATCCTATAGTAACGTC    |
| BAP3-F2  | <u>CCGCTCGAGT</u> CTAACACCAAATTTGTAGACTCT   |
| PHO3-F1  | <u>CCCAAGCTT</u> ATGTTTAAGTCTGTTGTTTATTCGG  |
| PHO3-F2  | <u>CCGCTCGAGT</u> TATTGTTTTAATAGGGTATCGTTG  |
| LSM12-F1 | <u>CCGGAATTC</u> ATGAGTGTGAGCCTTGAGCAA      |
| LSM12-F2 | <u>CCGCTCGAGT</u> ATCCACCTTTCTACCATC        |
| YHB1-F1  | <u>CCCAAGCTT</u> ATGCTAGCCGAAAAAACCCG       |
| YHB1-F2  | <u>CCGCTCGAGT</u> CTAAACTTGCACGGTTGACAT     |
| PTR2-F1  | <u>CCCAAGCTT</u> ATGCTCAACCATCCCAGCC        |
| PTR2-F2  | <u>CCGCTCGAGT</u> CTAATTTGGTGGTGGATCTTAG    |
| CAR1-F1  | <u>CCGGAATTC</u> ATGGAAACAGGACCTCATTACAA    |
| CAR1-F2  | <u>CCGCTCGAGT</u> CTACAATAAGGTTTCACCCAATGC  |
| NDE1-F1  | <u>CCGGAATTC</u> ATGATTAGACAATCATTAATGAAAA  |
| NDE1-F2  | <u>CCGCTCGAGT</u> AGATAGATGAATCTCTACCCAAG   |

### Point mutation

|                     |                                        |
|---------------------|----------------------------------------|
| RAD30/D570A-F1      | AGAGCACGCAGCCTATCATTTAGCA              |
| RAD30/D570A-F2      | TGCTAAATGATAGGCTGCGTGCTCT              |
| RAD30/F627,628AA-F1 | CCAAAAACATCTTATCAGCCGCTACAAGAAAAAATGA  |
| RAD30/F627,628AA-F2 | TCATTTTTTTCTTGTAGCGGCTGATAAGATGTTTTTGG |

### Yeast two-hybrid

|             |                                              |
|-------------|----------------------------------------------|
| BD-RAD30-F1 | ACGCGT <u>CGAC</u> ATGTCAAATTTACTTGGAAGGAG   |
| BD-RAD30-F2 | TGCA <u>CTGCAGT</u> CATTTTTTTCTTGTA AAAAATGA |
| BD-UBP3-F1  | CCGGAATTCATGAACATGCAAGACGCTAAC               |
| BD-UBP3-F2  | TGCA <u>CTGCAGT</u> TAAATTTCTCTTTTGATACATTA  |
| AD-LSM12-F1 | CCGGAATTCATGAGTGTGAGCCTTGAGC                 |

---

|                                 |                                                                                      |
|---------------------------------|--------------------------------------------------------------------------------------|
| AD-LSM12-F2                     | <u>CCGCTCGAGCTATCCACCTTTCCTACCATCG</u>                                               |
| <b>Co-immunoprecipitation</b>   |                                                                                      |
| PY26/P <sub>GPD</sub> -RAD30-F1 | <u>CCGGAATTCATGTCAAAATTTACTTGGAAGGAG</u>                                             |
| PY26/P <sub>GPD</sub> -RAD30-F2 | <u>GCGCAGCTCTTAAGCGTAGTCTGGGACGTCGTA</u><br><u>TGGGTATTTTTTCTTGTA AAAAATGAT</u>      |
| PY26/P <sub>TEF</sub> -LSM12-F1 | <u>TAAAGCGGCCGCATGAGTGTCAGCCTTGAGCAAAC</u>                                           |
| PY26/P <sub>TEF</sub> -LSM12-F2 | <u>GGAAGATCTTTACAGATCCTCTTCAGAGATGAGT</u><br><u>TTCTGCTCTCCACCTTTCCTACCATCGTC</u>    |
| PY26/P <sub>GPD</sub> -UBP3-F1  | <u>CCCAAGCTTATGAACATGCAAGACGCTAACAA</u>                                              |
| PY26/P <sub>GPD</sub> -UBP3-F2  | <u>CCGCTCGAGTTAAGCGTAGTCTGGGACGTCGTATGGGTA</u><br><u>ATTTCTCTTTTGATACATTA AAAATA</u> |
| <b>Subcellular localization</b> |                                                                                      |
| RAD30 -F1                       | <u>CCGGAATTCATGTCAAAATTTACTTGGAAGGAG</u>                                             |
| RAD30-F2                        | <u>TCGCCCTTGCTCACCATGCCGCCTCCTCTTTTTTTCTTGTA</u><br><u>AAAAATG</u>                   |
| eGFP-F1                         | <u>ATTTTTTACAAGAAAAAAGGAGGAGGCGGCATGGTGAGC</u><br><u>AAGGGCGAGGAG</u>                |
| eGFP-F2                         | <u>CCGCTCGAGTTACTTGTACAGCTCGTCCATG</u>                                               |
| LSM12-F1                        | <u>TAAAGCGGCCGCATGAGTGTCAGCCTTGAGCAAAC</u>                                           |
| LSM12-F2                        | <u>TCCTCGCCCTTGCTCACCATGCCGCCTCCTCCTCCACCTTT</u><br><u>CCTACCATCGT</u>               |
| mCherry-F1                      | <u>GACGATGGTAGGAAAGGTGGAGGAGGAGGCGGCATGGTG</u><br><u>AGCAAGGGCGAGG</u>               |
| mCherry-F2                      | <u>GGAAGATCTTTACTTGTACAGCTCGTCCATG</u>                                               |

277 "—" represented sequences of regions flanking of target gene or restriction site.

278

279 **Table S5. Primers used for RT-PCR in this study**

| Primer  | Sequence (5'-3')        | Description |
|---------|-------------------------|-------------|
| VHR2-F  | GGAGATGTCTAAGGATGA      | RT-PCR      |
| VHR2-R  | AGCCGTTTCAGTAAGATAT     | RT-PCR      |
| BAP3-F  | GCTTCCAGGTA ACTTCAA     | RT-PCR      |
| BAP3-R  | GTAATCAATTCCAACGGTAG    | RT-PCR      |
| PHO3-F  | CGGCTCATTGTCATTCTT      | RT-PCR      |
| PHO3-R  | ATCCATCTCACCAGTGTAT     | RT-PCR      |
| LSM12-F | CCAACAACACTCTTACTATCCAA | RT-PCR      |
| LSM12-R | GCTTATCACCAATGACTTCCA   | RT-PCR      |

---

|         |                        |        |
|---------|------------------------|--------|
| YHB1-F  | GCTAAGAACATTGACGATT    | RT-PCR |
| YHB1-R  | TTGGATAATGCTCAGGTT     | RT-PCR |
| PTR2-F  | TTGTTCTGGTTGTGCTTCA    | RT-PCR |
| PTR2-R  | ATTCGTCTTCTTCTTCGTAGTC | RT-PCR |
| CAR1-F  | GAAACAAACGGTGAAGGT     | RT-PCR |
| CAR1-R  | TGTAGCAGGAATGTATAATGG  | RT-PCR |
| NDE1-F  | GTGCTCTGGCTTATATTG     | RT-PCR |
| NDE1-R  | AGAATAGGAAGGTGAATGA    | RT-PCR |
| RAD30-F | CGAGTATTGATGAAGTATT    | RT-PCR |
| RAD30R  | GGTATAAGAGGTAGATGG     | RT-PCR |

---

280

281 Spot assays

282 Yeast cells cultivated in logarithmic phase, and diluted to an absorbance at 600 nm ( $A_{600}$ ) of 1.0  
283 in phosphate-buffered saline (pH 7.0). Then, 10-fold serial dilutions cells were spotted onto YNB  
284 plates containing no drug or the indicated concentrations of  $H_2O_2$ . Growth was assessed after  
285 incubation for 2-4 days at 30 °C.

286 Survival assays

287 Yeast cells cultivated in logarithmic phase, and harvested by centrifugation, washed with sterile  
288 water and resuspended in phosphate-buffered saline (pH 7.0) to 4  $OD_{600}$  cells per milliliter. Cells  
289 were then treated with various doses of  $H_2O_2$  for 1 h at 30 °C with 200 rpm shaking, followed by  
290 centrifugation and washing with sterile water for three times. After dilution, cells were plated in  
291 YNB medium plates and incubation at 30 °C for 2-4 days. Then the survival colonies were  
292 counted. Cells survival of each strain was expressed relative to that of untreated cells of the

293 corresponding strain.

294 Single cell gel electrophoresis

295 The Single cell gel electrophoresis was performed according to the protocol adopted for  
296 yeast cells (47). Approximately  $10^6$  cells were harvested by centrifugation (2 min at 18000  
297 g, 4 °C) and mixed with 1.5% (w/v) low melting agarose in S buffer (1 M sorbitol, 25 mM  
298  $\text{KH}_2\text{PO}_4$ , pH 6.5) containing approximately 2 mg/mL of zymolyase (20T; 20000U/g). 80  $\mu\text{l}$   
299 of this mixture were spread over a slide coated with a water solution of 0.5% (w/v) normal  
300 melting agarose. Covered with a cover slip and incubated for 30 min at 30 °C for cell wall  
301 enzymatic degradation, after which the cover slips were removed. All further procedures  
302 were performed in a cold room at 4 °C. Slides were incubated in a lysis buffer (30 mM  
303 NaOH, 1 M NaCl, 0.05% laurylsarcosine, 50 mM EDTA, 10 mM Tris-HCl, pH 10) for 2 h  
304 in order to lyse yeast spheroplasts. The slides were washed three times for 20 min each in  
305 electrophoresis buffer (30 mM NaOH, 10 mM EDTA, 10 mM Tris-HCl, pH 10) to remove  
306 lysis solution. The slides were then submitted to electrophoresis in the same buffer for 15  
307 min at 0.7 V/cm. After electrophoresis, the slides were incubated in a neutralization buffer  
308 (10 mM Tris-HCl, pH 7.4) for 10 min, followed by consecutive 5 min incubation in 76%  
309 and 96% ethanol. The slides were then air-dried and were visualized immediately or stored  
310 at 4 °C for later observation. For visualization in a fluorescence microscope the slides were  
311 stained with ethidium bromide (10  $\mu\text{g}/\text{mL}$ ) and 20 representative images of each slide were

312 acquired at magnification of 400× using a Leica Microsystems DM fluorescence  
313 microscope. The images were analyzed with the help of the free edition of Comet Assay  
314 Software Project (CASP) and the analytic parameter Tail Length (in μm) was chosen as the  
315 unit of DNA damage. In each slide, at least 20 comets were analyzed and error bars  
316 represent variability between the mean of at least three different slides obtained from  
317 biologically independent experiments.

### 318 Genome-wide transcription analysis

319 The wide-type, *rad30Δ* strains cultivated in logarithmic phase, and then H<sub>2</sub>O<sub>2</sub> was added for a  
320 final concentration of 2 mM. Cells collected after 1 h of H<sub>2</sub>O<sub>2</sub> treatment. Total RNA was isolated  
321 by using MiniBEST Universal RNA Extraction Kit (TaKaRa Bio, Shiga, Japan). The  
322 concentration and quality of total RNA were determined by microspectrophotometry using an  
323 Agilent 2100 Bioanalyzer (Agilent Technologies, Santa Clara, CA). Frozen samples were sent to  
324 the Majorbio Institute (<http://www.majorbio.com/>) for global gene analysis. The raw data is  
325 available at <https://www.ncbi.nlm.nih.gov/sra/SRP151558>, detailed descriptions are included in  
326 supplementary materials. The annotation and the Gene Ontology (GO) were based on the  
327 *Saccharomyces* Genome Database (SGD).

### 328 qRT-PCR analysis

329 Cells cultivated in logarithmic phase, and treated with 2 mM H<sub>2</sub>O<sub>2</sub> for 1 h. Total RNA was

330 extracted by using the MiniBEST Universal RNA Extraction Kit (TaKaRa Bio, Shiga, Japan).  
331 And the cDNA was synthesized by using the PrimeScript II 1st-strand cDNA synthesis kit  
332 (6210A; TaKaRa Bio). The quantitation of mRNA level was analyzed by using SYBR Premix  
333 ExTaq (RR420A; Takara Bio). *ACT1* as a standard control to normalized the gene expression.

#### 334 Yeast two-hybrid (Y2H) assays

335 All Y2H plasmids were based on either *pGBKT7* (Gal4<sub>BD</sub>) or *pGADT7* (Gal4<sub>AD</sub>). The  
336 *pGBKT7-RAD30*, *pGADT7-LSM12*, *pGADT7-UBP3*, and other point mutant fusion proteins  
337 plasmids were constructed by standard genetic techniques. Gal4<sub>AD</sub> and Gal4<sub>BD</sub> plasmids to be  
338 tested were co-transformed into the yeast strain *AHI09*, individual colonies were picked and then  
339 allowed to grow at 30 °C on an SD-Leu-Trp plate for 2-3 days, after which transformants were  
340 printed on SD-Leu-Trp, SD-Leu-Trp-Ade and SD-Leu-Trp-His selective plates with or without a  
341 certain amount of the histidine biosynthesis inhibitor 1,2,4-aminotrizole (3-AT) (48).

#### 342 Western blotting

343 Polη and PCNA containing C-terminal HA tag were expressed from its native promoter in  
344 wild-type and *lsm12Δ* strains. Cells were grown to logarithmic phase and harvested by  
345 centrifugation, than resuspended in lysis buffer containing 50 mM Tris·HCl (pH 7.5), 150 mM  
346 NaCl, 1 mM EDTA, 10% (vol/vol) glycerol, 0.1% Tween 20, 1 mM phenylmethylsulfonyl  
347 fluoride (PMSF), and 1 × complete protease inhibitor mixture (Sangon Biotech). Cells were



348 broken by bead beating (45 min at 4 °C) with glass beads and collected the supernatant. The  
349 extracts were resolved by SDS-PAGE in 10% acrylamide gels, and transferred to a PVDF  
350 membrane, blocked with 5% milk in TBST. The monoubiquitination level of pol $\eta$  and PCNA were  
351 probed with mouse Anti-HA tag antibody (ab18181) and rabbit Anti-Mouse IgG secondary  
352 antibodies conjugated HRP (ab6728). The bands were visualized using a ChemiDoc™ XRS+  
353 imaging system.

#### 354 Co-immunoprecipitation

355 Cells transformed with indicated plasmids and total proteins were extracted by lysis buffer. The  
356 extracts were incubated with 25  $\mu$ L anti-HA-conjugated magnetic beads (Bio-Rad) over night at  
357 4 °C and washed three times by lysis buffer. Next the precipitates were eluted into 100 mM  
358 Glycine (pH 2.5) and 100 mM NaCl, immediately neutralized by 2 M Tris·HCl (pH 9.0) and 100  
359 mM NaCl, and finally performed the immunoblot analysis.

#### 360 Microscope analysis

361 The method followed as described previously (49, 50) with slight modifications. Yeast strains  
362 cultivated in logarithmic phase, incubation with 2 mM H<sub>2</sub>O<sub>2</sub> for 2 h or 0.12% MMS for 1 h. Then  
363 cells were harvested by centrifuging and washed with 0.1 M phosphate buffer (PBS, pH 7.5).  
364 The pellet was resuspended in 20  $\mu$ L 0.1 M PBS with 1.2 M sorbitol for microscopy observation.  
365 Images were obtained with Leica TCS SP8 confocal microscope, using 488 nm for eGFP. The

366 percentage of cells with foci was counted in three independent experiments, and at least 500 cells  
367 per experiment.

368 Quantification and statistical analysis

369 For quantification of the western blot data, Image J software was used to measure the relative  
370 intensity of each band, and the relative PCNA-Ub and Polη-Ub protein levels were normalized to  
371 the relative β-Actin levels. Quantification data were presented as the mean ± SD (standard  
372 deviation) from at least three independent experiments. Statistical differences were determined  
373 by the *t* test.

#### 374 **ACKNOWLEDGMENTS**

375 This work was supported by the National Natural Science Foundation of China (21706095,  
376 21676118), Jiangsu Province “333 High-level Talents Cultivating Project” (BRA2016365), and  
377 the national first-class discipline program of Light Industry Technology and Engineering  
378 (LITE2018-20).

379 Author contributions: R.Y., L.L. and J.W. designed research; R.Y., L.S., C.W., and W.Q.  
380 performed research; R.Y. and J.W. analyzed data; and R.Y. and L.L. wrote the paper.

381 Competing financial interests: The authors declare no competing financial interests.

## 382 REFERENCES

- 383 1. **Novarina D, Mavrova SN, Janssens GE, Rempel IL, Veenhoff LM, Chang M.** 2017.  
384 Increased genome instability is not accompanied by sensitivity to DNA damaging agents  
385 in aged yeast cells. *DNA Repair* **54**:1-7.
- 386 2. **Hayashi MT, Cesare AJ, Rivera T, Karlseder J.** 2015. Cell death during crisis is  
387 mediated by mitotic telomere deprotection. *Nature* **522**:492-496.
- 388 3. **Saini P, Beniwal A, Vij S.** 2017. Physiological response of *Kluyveromyces marxianus*  
389 during oxidative and osmotic stress. *Process Biochem* **56**:21-29.
- 390 4. **Zhao HW, Li JY, Han BZ, Li X, Chen JY.** 2014. Improvement of oxidative stress  
391 tolerance in *Saccharomyces cerevisiae* through global transcription machinery  
392 engineering. *J Ind Microbiol Biot* **41**:869-878.
- 393 5. **Roukas T.** 2016. The role of oxidative stress on carotene production by *Blakeslea*  
394 *trispota* in submerged fermentation. *Criti Rev Biotechno* **36**:424-433.
- 395 6. **Naiman K, Pages V, Fuchs RP.** 2016. A defect in homologous recombination leads to  
396 increased translesion synthesis in *E. coli*. *Nucleic Acids Res* **44**:7691-7699.
- 397 7. **Fumasoni M, Zwicky K, Vanoli F, Lopes M, Branzei D.** 2015. Error-free DNA damage  
398 tolerance and sister chromatid proximity during DNA replication rely on the pol  
399 alpha/Primase/Ctf4 complex. *Mol Cell* **57**:812-823.
- 400 8. **Villoria MT, Ramos F, Duenas E, Faull P, Cutillas PR, Clemente-Blanco A.** 2017.

- 401 Stabilization of the metaphase spindle by Cdc14 is required for recombinational DNA  
402 repair. *EMBO J* **36**:79-101.
- 403 9. **Shemesh K, Sebesta M, Pacesa M, Sau S, Bronstein A, Parnas O, Liefshitz B,**  
404 **Venclovas C, Krejci L, Kupiec M.** 2017. A structure-function analysis of the yeast Elg1  
405 protein reveals the importance of PCNA unloading in genome stability maintenance.  
406 *Nucleic Acids Res* **45**:3189-3203.
- 407 10. **Gervai JZ, Galicza J, Szeltner Z, Zamborszky J, Szuts D.** 2017. A genetic study based  
408 on PCNA-ubiquitin fusions reveals no requirement for PCNA polyubiquitylation in DNA  
409 damage tolerance. *DNA Repair* **54**:46-54.
- 410 11. **Northam MR, Trujillo KM.** 2016. Histone H2B mono-ubiquitylation maintains  
411 genomic integrity at stalled replication forks. *Nucleic Acids Res* **44**:9245-9255.
- 412 12. **Zhang SC, Wang LL, Tao Y, Bai TY, Lu R, Zhang TL, Chen JY, Ding JP.** 2017.  
413 Structural basis for the functional role of the Shu complex in homologous recombination.  
414 *Nucleic Acids Res* **45**: 13068-13079.
- 415 13. **Budzowska M, Graham TGW, Sobeck A, Waga S, Walter JC.** 2015. Regulation of the  
416 Rev1-pol zeta complex during bypass of a DNA interstrand cross-link. *EMBO J*  
417 **34**:1971-1985.
- 418 14. **Rechkoblit O, Kolbanovskiy A, Landes H, Geacintov NE, Aggarwal AK.** 2017.  
419 Mechanism of error-free replication across benzo [a] pyrene stereoisomers by Rev1 DNA  
420 polymerase. *Nat Commun* **8**:965.

- 
- 421 15. **Huang M, Zhou B, Gong J, Xing L, Ma X, Wang F, Wu W, Shen H, Sun C, Zhu X,**  
422 **Yang Y, Sun Y, Liu Y, Tang T-S, Guo C.** 2018. RNA-splicing factor SART3 regulates  
423 translesion DNA synthesis. *Nucleic Acids Res* **46**:4560-4574.
- 424 16. **Yang Y, Gao Y, Mutter-Rottmayer L, Zlatanou A, Durando M, Ding W, Wyatt D,**  
425 **Ramsden D, Tanoue Y, Tateishi S, Vaziri C.** 2017. DNA repair factor Rad18 and DNA  
426 polymerase pol kappa confer tolerance of oncogenic DNA replication stress. *J Cell Biol*  
427 **216**:3097-3115.
- 428 17. **Vujanovic M, Krietsch J, Raso MC, Terraneo N, Zellweger R, Schmid JA,**  
429 **Taglialatela A, Huang J-W, Holland CL, Zwicky K, Herrador R, Jacobs H, Cortez D,**  
430 **Ciccia A, Penengo L, Lopes M.** 2017. Replication fork slowing and reversal upon DNA  
431 damage require PCNA polyubiquitination and ZRANB3 DNA translocase activity. *Mol*  
432 *Cell* **67**:882-890.
- 433 18. **Vaisman A, Woodgate R.** 2017. Translesion DNA polymerases in eukaryotes: what  
434 makes them tick? *Crit Rev Biochem Mol* **52**:274-303.
- 435 19. **Tellier-Lebegue C, Dizet E, Ma E, Veaute X, Coic E, Charbonnier JB, Maloisel L.**  
436 2017. The translesion DNA polymerases pol zeta and Rev1 are activated independently of  
437 PCNA ubiquitination upon UV radiation in mutants of DNA polymerase delta. *Plos Genet*  
438 **13**: e1007119.
- 439 20. **Sale JE, Lehmann AR, Woodgate R.** 2012. Y-family DNA polymerases and their role in  
440 tolerance of cellular DNA damage. *Nat Rev Mol Cell Bio* **13**:141-152.

- 
- 441 21. **De Palma A, Morren MA, Ged C, Pouvelle C, Taieb A, Aoufouchi S, Sarasin A.** 2017.  
442 Diagnosis of xeroderma pigmentosum variant in a young patient with two novel  
443 mutations in the POLH gene. *Am J Med Genet A* **173**:2511-2516.
- 444 22. **Xue QZ, Zhong MY, Liu BY, Tang Y, Wei ZL, Guengerich FP, Zhang HD.** 2016.  
445 Kinetic analysis of bypass of 7, 8-dihydro-8-oxo-2'-deoxyguanosine by the catalytic core  
446 of yeast DNA polymerase eta. *Biochimie* **121**:161-169.
- 447 23. **Choi JH, Pfeifer GP.** 2005. The role of DNA polymerase eta in UV mutational spectra.  
448 *DNA Repair* **4**:211-220.
- 449 24. **Liu BY, Xue QZ, Gu SL, Wang WP, Chen J, Li YQ, Wang CX, Zhang HD.** 2016.  
450 Kinetic analysis of bypass of O-6-methylguanine by the catalytic core of yeast DNA  
451 polymerase eta. *Arch Biochem Biophys* **596**:99-107.
- 452 25. **Yang JT, Wang R, Liu BY, Xue QZ, Zhong MY, Zeng H, Zhang HD.** 2015. Kinetic  
453 analysis of bypass of abasic site by the catalytic core of yeast DNA polymerase eta. *Mutat*  
454 *Res-Fund Mol M* **779**:134-143.
- 455 26. **Saito Y, Zhou H, Kobayashi J.** 2015. Chromatin modification and NBS1: their  
456 relationship in DNA double-strand break repair. *Genes Genet Syst* **90**:195-208.
- 457 27. **Boehm EM, Powers KT, Kondratick CM, Spies M, Houtman JCD, Washington MT.**  
458 2016. The proliferating cell nuclear antigen (PCNA)-interacting protein (PIP) motif of  
459 DNA polymerase mediates its interaction with the C-terminal domain of Rev1. *J Biol*  
460 *Chem* **291**:8735-8744.

- 
- 461 28. **Donigan KA, Cerritelli SM, McDonald JP, Vaisman A, Crouch RJ, Woodgate R.**  
462 2015. Unlocking the steric gate of DNA polymerase eta leads to increased genomic  
463 instability in *Saccharomyces cerevisiae*. *DNA Repair* **35**:1-12.
- 464 29. **Wit N, Buoninfante OA, van den Berk PCM, Jansen JG, Hogenbirk MA, de Wind N,**  
465 **Jacobs H.** 2015. Roles of PCNA ubiquitination and TLS polymerases kappa and eta in  
466 the bypass of methyl methanesulfonate-induced DNA damage. *Nucleic Acids Res*  
467 **43**:282-294.
- 468 30. **Chen X, Bosques L, Sung P, Kupfer GM.** 2016. A novel role for non-ubiquitinated  
469 FANCD2 in response to hydroxyurea-induced DNA damage. *Oncogene* **35**:22-34.
- 470 31. **de Moura MB, Fonseca Chamber-Reis BL, Passos Silva DG, Rajao MA, Macedo**  
471 **AM, Franco GR, Junho Pena SD, Ribeiro Teixeira SM, Machado CR.** 2009. Cloning  
472 and characterization of DNA polymerase eta from *Trypanosoma cruzi*: roles for  
473 translesion bypass of oxidative damage. *Environ Mol Mutagen* **50**:375-386.
- 474 32. **Zlatanou A, Despras E, Braz-Petta T, Boubakour-Azzouz I, Pouvelle C, Stewart GS,**  
475 **Nakajima S, Yasui A, Ishchenko AA, Kannouche PL.** 2011. The hMsh2-hMsh6  
476 complex acts in concert with monoubiquitinated PCNA and Pol eta in response to  
477 oxidative DNA damage in human cells. *Mol Cell* **43**:649-662.
- 478 33. **Boehm EM, Spies M, Washington MT.** 2016. PCNA tool belts and polymerase bridges  
479 form during translesion synthesis. *Nucleic Acids Res* **44**:8250-8260.
- 480 34. **Fleischer TC, Weaver CM, McAfee KJ, Jennings JL, Link AJ.** 2006. Systematic

- 
- 481 identification and functional screens of uncharacterized proteins associated with  
482 eukaryotic ribosomal complexes. *Gene Dev* **20**:1294-1307.
- 483 35. **Lee MW, Kim BJ, Choi HK, Ryu MJ, Kim SB, Kang KM, Cho EJ, Youn HD, Huh**  
484 **WK, Kim ST.** 2007. Global protein expression profiling of budding yeast in response to  
485 DNA damage. *Yeast* **24**:145-154
- 486 36. **Acharya N, Brahma A, Haracska L, Prakash L, Prakash S.** 2007. Mutations in the  
487 ubiquitin binding UBZ motif of DNA polymerase eta do not impair its function in  
488 translesion synthesis during replication. *Mol Cell Biol* **27**:7266-7272.
- 489 37. **van der Kemp PA, de Padula M, Burguiere-Slezak G, Ulrich HD, Boiteux S.** 2009.  
490 PCNA monoubiquitylation and DNA polymerase eta ubiquitin-binding domain are  
491 required to prevent 8-oxoguanine-induced mutagenesis in *Saccharomyces cerevisiae*.  
492 *Nucleic Acids Res* **37**:2549-2559.
- 493 38. **Enervald E, Lindgren E, Katou Y, Shirahige K, Strom L.** 2013. Importance of Pol eta  
494 for damage-induced cohesion reveals differential regulation of cohesion establishment at  
495 the break site and genome-wide. *Plos Genet* **9**:17.
- 496 39. **Lau WCY, Li YY, Zhang QF, Huen MSY.** 2015. Molecular architecture of the  
497 Ub-PCNA/pol eta complex bound to DNA. *Sci Rep* **5**:15759.
- 498 40. **Haracska L, Unk I, Prakash L, Prakash S.** 2006. Ubiquitylation of yeast proliferating  
499 cell nuclear antigen and its implications for translesion DNA synthesis. *Proc Natl Acad*  
500 *Sci USA* **103**:6477-6482.



- 
- 501 41. **Pabla R, Rozario D, Siede W.** 2008. Regulation of *Saccharomyces cerevisiae* DNA  
502 polymerase eta transcript and protein. *Radiat Environ Bioph* **47**:157-168.
- 503 42. **Bienko M, Green CM, Sabbioneda S, Crosetto N, Matic I, Hibbert RG, Begovic T,**  
504 **Niimi A, Mann M, Lehmann AR, Dikic I.** 2010. Regulation of translesion synthesis  
505 DNA polymerase eta by monoubiquitination. *Mol Cell* **37**:396-407.
- 506 43. **Alvarez V, Vinas L, Gallego-Sanchez A, Andres S, Sacristan MP, Bueno A.** 2016.  
507 Orderly progression through S-phase requires dynamic ubiquitylation and  
508 deubiquitylation of PCNA. *Sci Rep* **6**:25513
- 509 44. **Bilsland E, Hult M, Bell SD, Sunnerhagen P, Downs JA.** 2007. The Bre5/Ubp3  
510 ubiquitin protease complex from budding yeast contributes to the cellular response to  
511 DNA damage. *DNA Repair* **6**:1471-1484.
- 512 45. **Mao P, Smerdon MJ.** 2010. Yeast deubiquitinase Ubp3 interacts with the 26 S  
513 proteasome to facilitate Rad4 degradation. *J Biol Chem* **285**:37542-37550.
- 514 46. **Baudin A, Ozierkalogeropoulos O, Denouel A, Lacroute F, Cullin C.** 1993. A simple  
515 and efficient method for direct gene deletion in *Saccharomyces cerevisiae*. *Nucleic Acids*  
516 *Res* **21**:3329-3330.
- 517 47. **Azevedo F, Marques F, Fokt H, Oliveira R, Johansson B.** 2011. Measuring oxidative  
518 DNA damage and DNA repair using the yeast comet assay. *Yeast* **28**:55-61.
- 519 48. **Xu X, Lin A, Zhou C, Blackwell SR, Zhang Y, Wang Z, Feng Q, Guan R, Hanna MD,**  
520 **Chen Z, Xiao W.** 2016. Involvement of budding yeast Rad5 in translesion DNA

- 521 synthesis through physical interaction with Rev1. *Nucleic Acids Res* **44**:5231-5245.
- 522 49. **Tkach JM, Yimit A, Lee AY, Riffle M, Costanzo M, Jaschob D, Hendry JA, Ou J,**  
523 **Moffat J, Boone C, Davis TN, Nislow C, Brown GW.** 2012. Dissecting DNA damage  
524 response pathways by analysing protein localization and abundance changes during DNA  
525 replication stress. *Nat Cell Biol* **14**:966-976.
- 526 50. **Fan Q, Xu X, Zhao X, Wang Q, Xiao W, Guo Y, Fu YV.** 2018. Rad5 coordinates  
527 translesion DNA synthesis pathway by recognizing specific DNA structures in  
528 *Saccharomyces cerevisiae*. *Curr Genet* **64**:889-899.

529 **FIGURES and FIGURE LEGENDS**

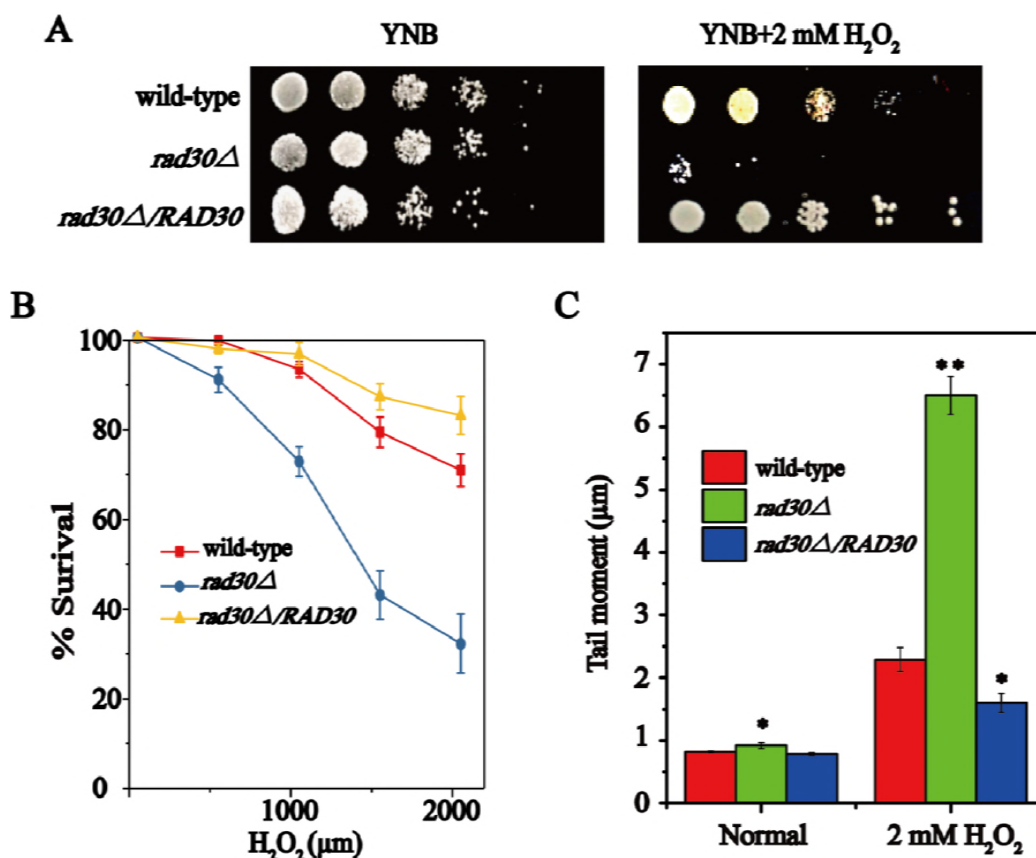

530  
531 **Figure 1.** *RAD30* is required for *S. cerevisiae* growth in the presence of H<sub>2</sub>O<sub>2</sub>. (A) Wild-type,  
532 *rad30*Δ, and *rad30*Δ/*RAD30* strains were spotted on YNB plates under normal and 2 mM H<sub>2</sub>O<sub>2</sub>  
533 conditions. (B) The survival rate of wild-type, *rad30*Δ, and *rad30*Δ/*RAD30* cells over a range of  
534 H<sub>2</sub>O<sub>2</sub> doses (0, 500, 1000, 1500, 2000 μM). (C) Comet assay in wild-type, *rad30*Δ, and  
535 *rad30*Δ/*RAD30* strains exposed to normal or 2 mM H<sub>2</sub>O<sub>2</sub> conditions. Data represent the means of  
536 three biological replicates (N = 3), and error bars represent SD. \* P ≤ 0.05, \*\* P ≤ 0.01.  
537

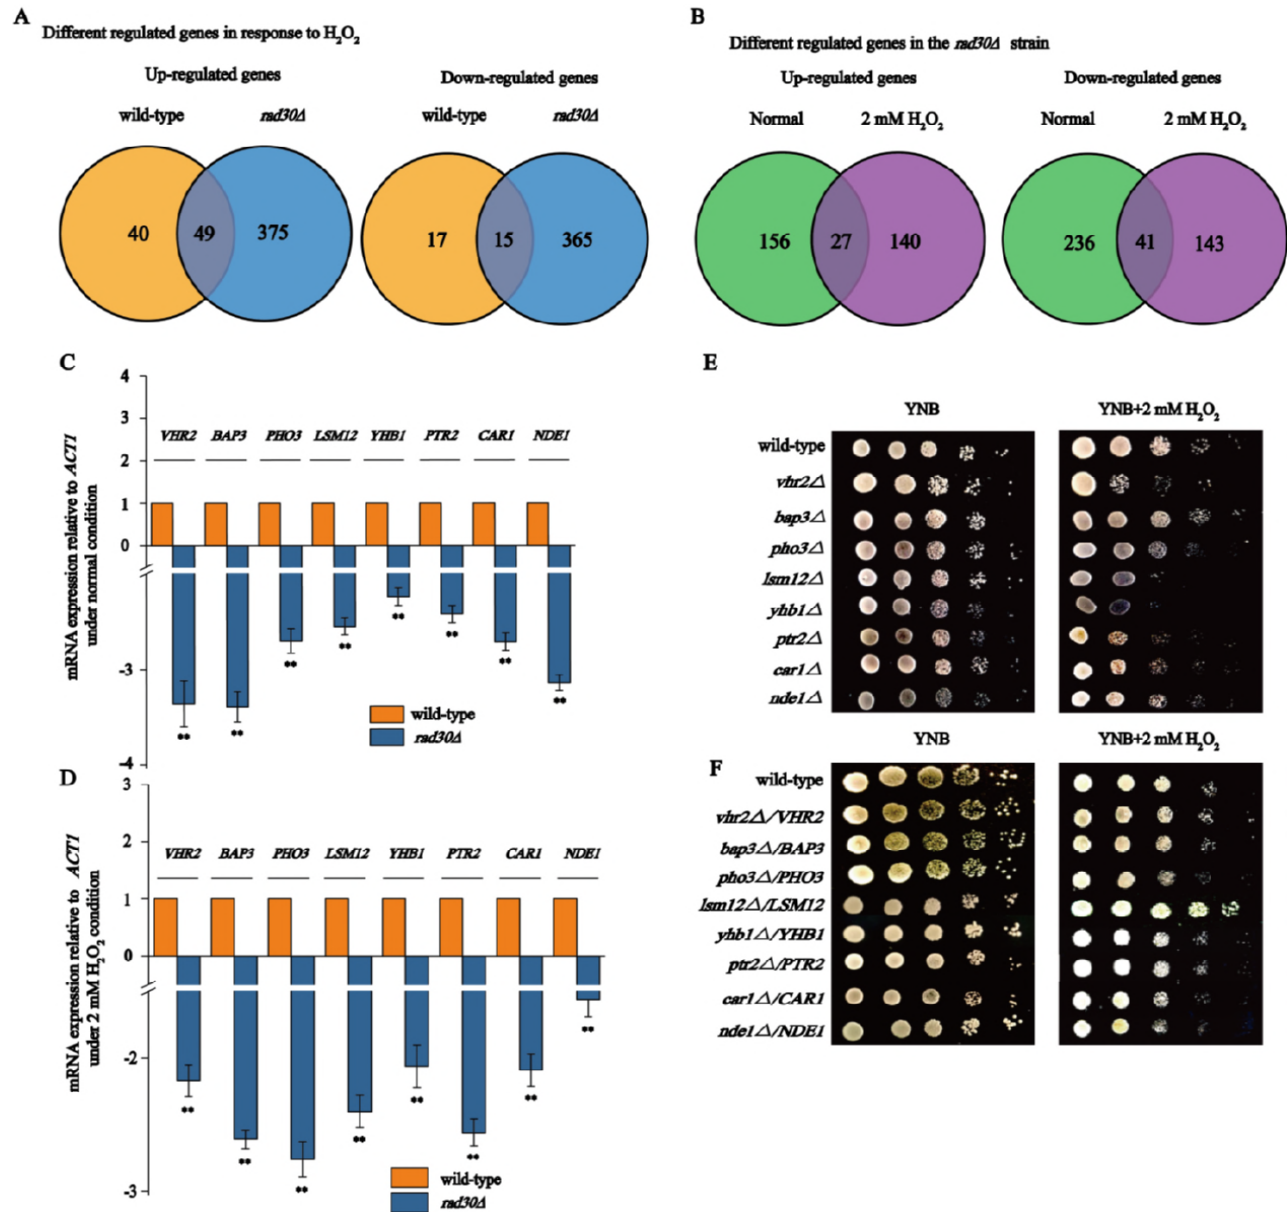

538

539 **Figure 2.** *LSM12* is involved in DNA damage tolerance. (A) Venn diagrams depicting the  
 540 overlap between up-regulated and down-regulated genes in wild-type and *rad30Δ* strains in the  
 541 normal condition compared with the gene expression levels in the corresponding strains at the 2  
 542 mM  $H_2O_2$  condition. (B) Up-regulated and down-regulated genes in the *rad30Δ* mutant relative  
 543 to their expression in the wild-type strain under normal and 2 mM  $H_2O_2$  conditions. (C and D)  
 544 qRT-PCR verified the mRNA expression levels of the most commonly down-regulated genes,

545 calculated relative to the *ACT1* level, under normal and 2 mM H<sub>2</sub>O<sub>2</sub> conditions. Data represent  
546 the means of three biological replicates (N = 3), and error bars represent SD. \*\*P ≤ 0.01. (E) The  
547 most commonly down-regulated genes were deleted and the mutant strains were spotted on YNB  
548 plates under normal and 2 mM H<sub>2</sub>O<sub>2</sub> conditions. (F) The most commonly down-regulated genes  
549 were overexpressed and the mutant strains were spotted on YNB plates under normal and 2 mM  
550 H<sub>2</sub>O<sub>2</sub> conditions.

551

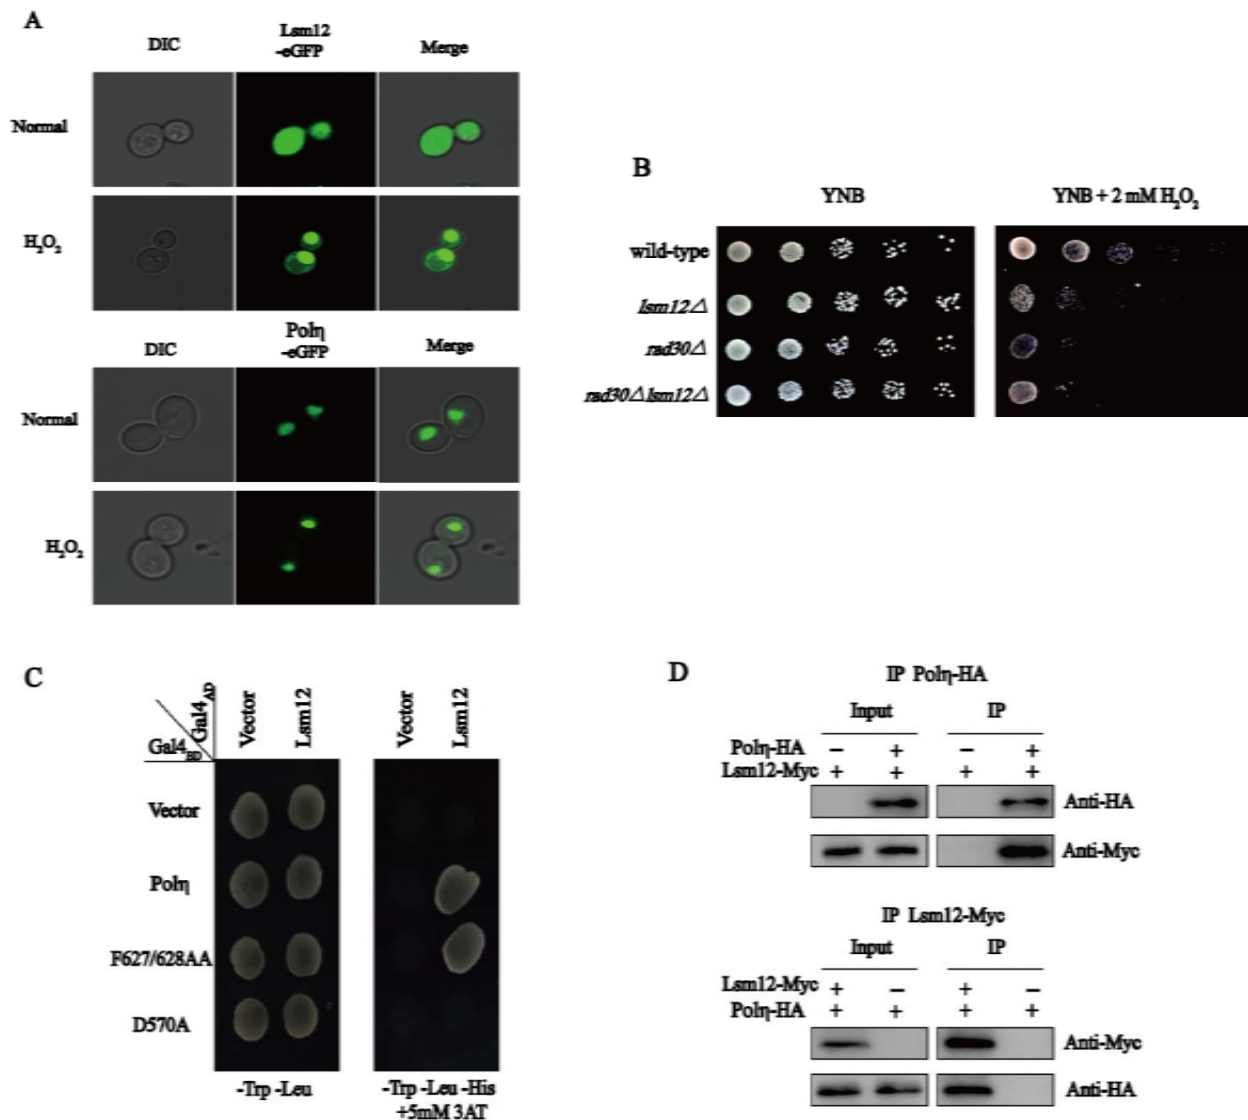

552

553

554 **Figure 3.** Polη interacts with Lsm12 through the UBZ domain. (A) Polη and Lsm12 were fused

555 with the eGFP reporter and overexpressed, and the subcellular localization was visualized under

556 normal and 2 mM H<sub>2</sub>O<sub>2</sub> conditions. (B) The wild-type, *lsm12Δ*, *rad30Δ*, and *rad30Δlsm12Δ*

557 strains were spotted on YNB plates with or without H<sub>2</sub>O<sub>2</sub>. (C) Yeast two-hybrid assays confirmed

558 the interaction between Polη and Lsm12; the D570A mutant failed to interact with Lsm12. (D)

559 Co-immunoprecipitation assay to detect the interaction between Pol $\eta$  and Lsm12 *in vivo*.

560

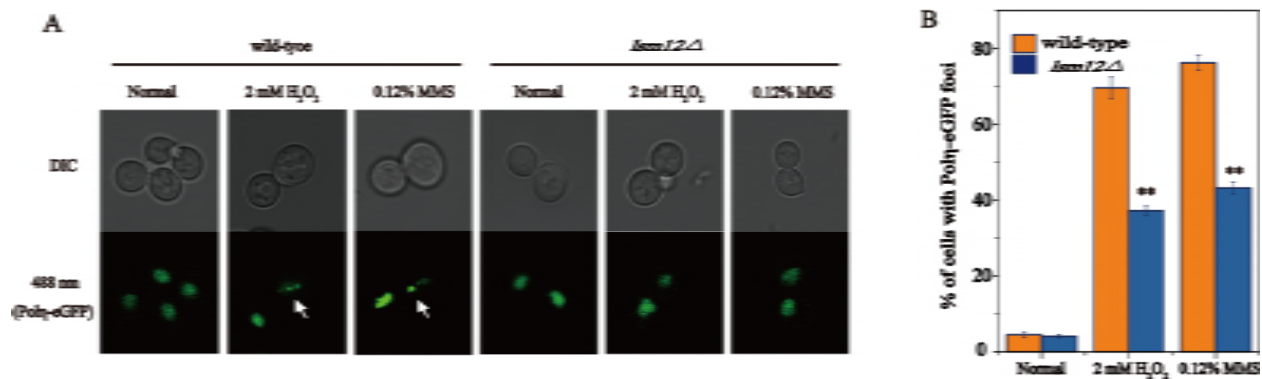

561

562 **Figure 4.** Lsm12 promotes Polη focus formation. (A) Formation of Polη foci when cells of

563 wild-type and *lsm12Δ* strains were treated with different DNA-damaging agents. (B) Percentage

564 of cells of different strains displaying Polη-eGFP foci in different environments. The histograms

565 represent the mean ± SD from three independent experiments, \*\* P ≤ 0.01.

566



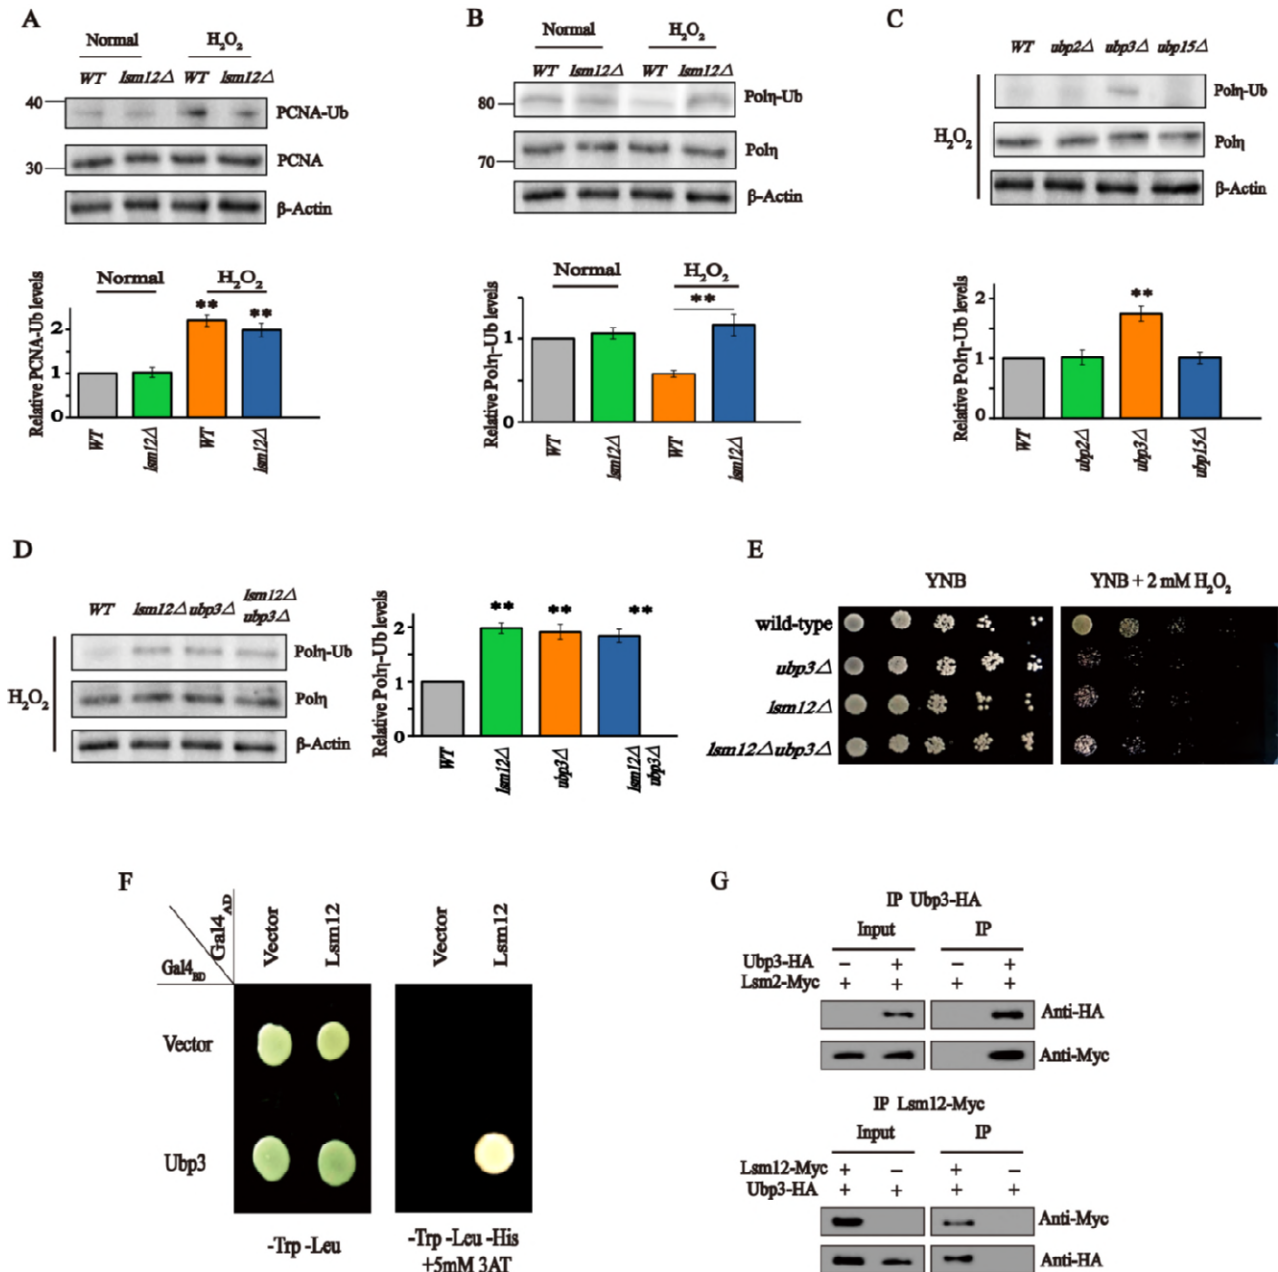

567

568 **Figure 5.** Lsm12 promoted Polη deubiquitination through Ubp3. (A) The level of

569 monoubiquitinated PCNA in the wild-type and *lsm12Δ* strains. The level of monoubiquitinated

570 Polη in the wild-type strain and (B) *lsm12Δ*; (C) *ubp2Δ*, *ubp3Δ*, and *ubp15Δ*; and (D) *ubp3Δ*,

571 *lsm12Δ*, and *ubp3Δlsm12Δ* strains. β-Actin was used as a loading control. Data represent means

572 of three biological replicates (N = 3), and error bars represent SD. \*\*P ≤ 0.01. (E) Spot assays in

573 the wild-type, *ubp3Δ*, *lsm12Δ*, and *ubp3Δlsm12Δ* strains with or without H<sub>2</sub>O<sub>2</sub>. (F) Yeast  
574 two-hybrid assays confirmed the interaction between Lsm12 and Ubp3. (G)  
575 Co-immunoprecipitation assay to detect the interaction between Lsm12 and Ubp3 *in vivo*.

576

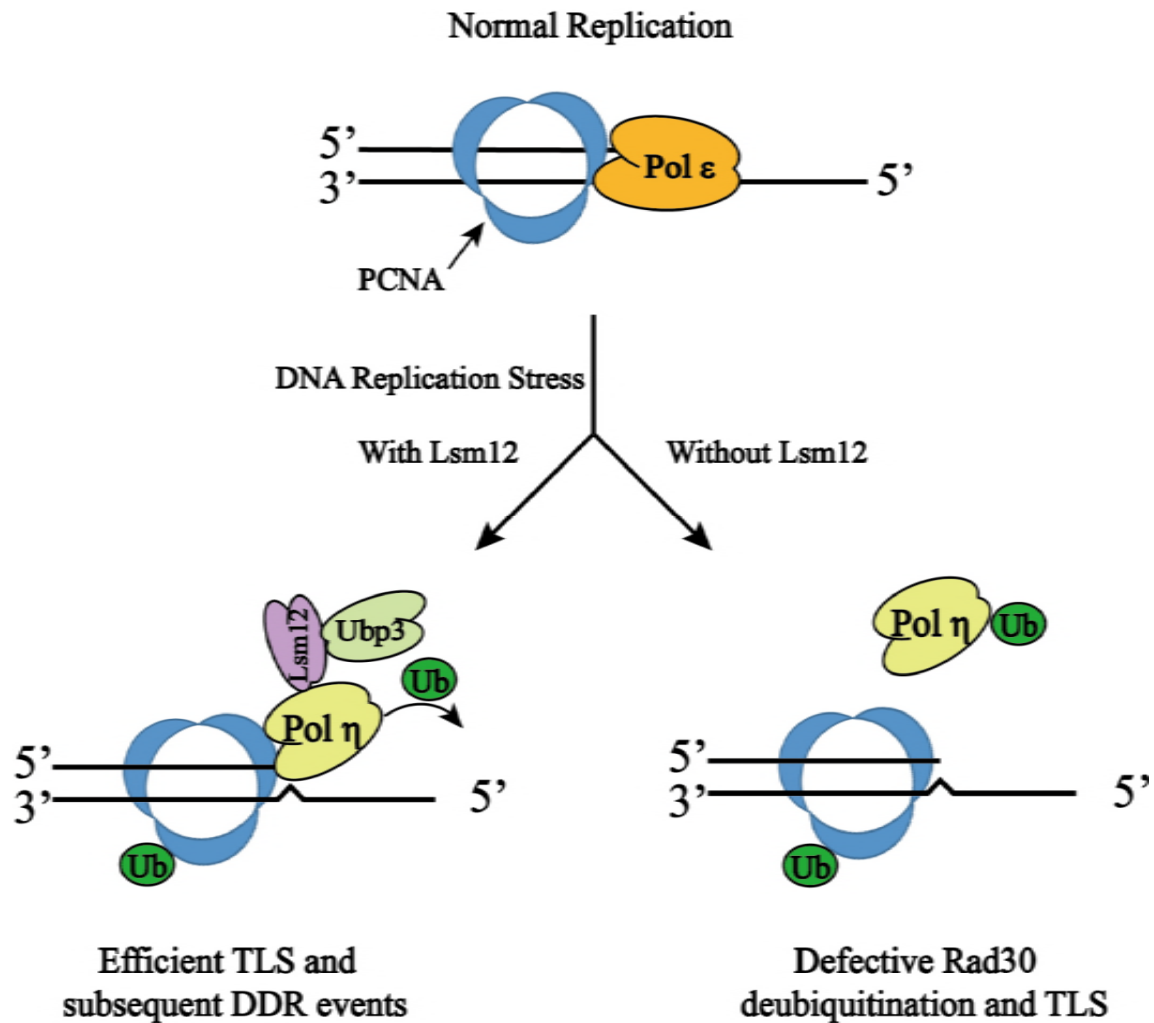

577

578 **Figure 6.** Model depicting the molecular function of Lsm12. When cells are under DNA

579 replication stress, Lsm12 binds with Ubp3 and promote the deubiquitination of Pol $\eta$ , which

580 activates the TLS pathway. In the absence of Lsm12, cells fail to deubiquitinate Pol $\eta$ , causing

581 defective TLS.

582

583 Table 1. H<sub>2</sub>O<sub>2</sub> sensitivity of various yeast strains.

| Strain                        | Survival, % (without H <sub>2</sub> O <sub>2</sub> ) | Survival, % (2 mM H <sub>2</sub> O <sub>2</sub> ) |
|-------------------------------|------------------------------------------------------|---------------------------------------------------|
| wild-type                     | 100                                                  | 70.4 (±3.9)                                       |
| <i>rad30</i> Δ                | 99.8(±1.64)                                          | 31.7 (±4.9) **                                    |
| <i>rad30</i> Δ/ <i>RAD30</i>  | 98.1(±1.48)                                          | 84.5 (±4.1) **                                    |
| <i>lsm12</i> Δ                | 98.5(±2.26)                                          | 36.5 (±4.7) **                                    |
| <i>rad30</i> Δ <i>lsm12</i> Δ | 96.3(±0.75)                                          | 33.6 (±2.2) **                                    |
| <i>ubp3</i> Δ                 | 98.1(±1.74)                                          | 40.7 (±3.6) **                                    |
| <i>lsm12</i> Δ <i>ubp3</i> Δ  | 96.1(±2.22)                                          | 34.3 (±1.9) **                                    |

584 Survival rates, with the standard deviations shown, are expressed relative to those of wild-type

585 cells. Results are the average of three experiments. \*\* P values versus WT ≤ 0.01.
